1 **Pronounced phenotypic differentiation in a wide-dispersing marine**  
2 **snail in response to contrasting selection pressures at a local scale**

3

4 Nicolás Bonel<sup>1,2,3\*</sup>, Jean-Pierre Pointier<sup>4</sup> & Pilar Alda<sup>1,2</sup>

5

6

7

8 <sup>1</sup> Laboratorio de Zoología de Invertebrados I, Departamento de Biología, Bioquímica y Farmacia,  
9 Universidad Nacional del Sur (UNS), San Juan 670, (B8000ICN) Bahía Blanca, Argentina.

10

11

12 <sup>2</sup> Consejo Nacional de Investigaciones Científicas y Técnicas (CONICET), Argentina.

13

14

15 <sup>3</sup> Centre d'Écologie Fonctionnelle et Évolutive, UMR 5175, CNRS—Université de Montpellier,  
16 Université Paul-Valéry Montpellier—École Pratique des Hautes Études—IRD, 34293 Montpellier Cedex  
17 05, France.

18

19 <sup>4</sup> PSL Research University, USR 3278 CNRS–EPHE, CRIOBE Université de Perpignan, Perpignan,  
20 France.

21

22 \* To whom correspondence should be addressed: [nicobonel@gmail.com](mailto:nicobonel@gmail.com) (N. Bonel)

23

24

25

26

27 **Running head:** Pronounced phenotypic differentiation in a wide dispersing snail

28

29

30

31

32 **Key words:** phenotypic plasticity, intertidal zonation, contrasting selection pressures,  
33 shell characters, genital morphology, high dispersal potential, planktotrophic snail.

34

35 **Abstract**

- 36 1. Heterogeneous environments pose a particular challenge for organisms because the  
37 same phenotype is unlikely to perform best regardless of the types of stress it  
38 encounters. The grain size theory predicts that species with high dispersal potential  
39 experience a more heterogeneous, fine-grained environment where phenotypic  
40 plasticity may evolve to cope with habitat heterogeneity.
- 41 2. To understand how species meet this challenge, we investigated the extent to which  
42 contrasting selection pressures induced ecological and phenotypic responses in a  
43 natural population of a wide-dispersing marine snail.
- 44 3. We collected, measured external and internal characters, weighted, and dissected  
45 individuals of *Heleobia australis* (Rissooidea: Cochliopidae) from heterogeneous  
46 habitats from the intertidal area of the Bahía Blanca estuary, Argentina. We also  
47 conducted molecular analyses by amplifying the COI gene in individuals sampled  
48 from each habitat.
- 49 4. We found that subpopulations of *H. australis*, inhabiting close to each other and  
50 without physical barriers, exhibited a strong phenotypic differentiation in shell  
51 characters and body weight in response to environmental conditions (thermal, saline,  
52 and dehydration stress), crab predation, and parasites. We proved that this  
53 differentiation occurred even early in life as most of the characters observed in  
54 juveniles mirrored those found in adults. We also found a clear variation in penis size  
55 in snails collected from each habitat and raised in common garden laboratory  
56 conditions. The COI gene analysis confirmed that the individuals studied constituted  
57 a single species despite the strong phenotypic difference among subpopulations.
- 58 5. The pronounced phenotypic differentiation in *H. australis* is all the more remarkable  
59 because it occurred at a very small geographical scale, which is rarely documented  
60 for a wide-dispersing species. Our findings provide a reasonable ground for  
61 advocating that *H. australis* experienced a fine-grained environment and, thus,  
62 benefited from the combined effect of directional selection and plasticity to evolve  
63 locally adapted phenotypes to contrasting habitat conditions at a local scale.

## 64 **Introduction**

65 If organisms have difficulties in adapting to human-induced global change and fail to  
66 track projected environmental changes, populations become vulnerable to decline and  
67 extinction (Hill, Griffiths, & Thomas, 2011; Hoffmann & Sgrò, 2011). Phenotypic  
68 plasticity, a common feature in nature across many taxa, is the ability of a single  
69 genotype to express different phenotypes in dissimilar biotic or abiotic environments  
70 (Travis, 1994; West-Eberhard, 2003). Many studies indicate a role of plasticity in  
71 shaping phenotypic responses as an effective mechanism that can greatly improve the  
72 conditions for persistence of populations facing abrupt environmental shift by  
73 facilitating rapid adaptation to the new selection pressures (e.g. Chevin & Lande, 2009;  
74 Ghalambor, McKay, Carroll, & Reznick, 2007; Price, Qvarnström, & Irwin, 2003). An  
75 adaptive evolutionary response to environmentally induced non-heritable variation  
76 occurs when phenotypic plasticity operates jointly with directional selection causing the  
77 expression of potentially beneficial traits (De Jong, 2005; Fusco & Minelli, 2010;  
78 Merilä & Hendry, 2014) and allowing the population to reach the fitness optimum (i.e.  
79 ‘genetic assimilation’; Pigliucci, 2006; Waddington, 1953; West-Eberhard, 1989). In  
80 this sense, phenotypic plasticity is crucial for the long-term persistence of populations  
81 facing new environmental stress brought about by human-induced global change (Hill et  
82 al., 2011).

83

84 Strategies to cope with environmental variation will depend upon the organism’s  
85 dispersal ability since it sets the environmental grain and plays a crucial role in  
86 determining levels of gene flow among populations, and thus, in the evolution of  
87 phenotypic traits within those populations (De Jong, 1999, 2005; Levins, 1968; Mather,  
88 1955; Scheiner, 1998; Via & Lande, 1985). According to the grain-size model, the  
89 evolution of traits will follow different pathways in species with contrasting abilities to  
90 disperse. For instance, aquatic snails display a wide range of reproductive modes and  
91 larval development types, ranging from species with immobile larvae to those with  
92 planktotrophic (free-floating) larvae (Janson, 1987; Johannesson, 2003; Parsons, 1997,  
93 1998; Yamada, 1987). Specifically, snails with restricted dispersal (absence of  
94 planktotrophic larvae) may experience a coarse-grained environment, as they tend to  
95 stay in the same habitat all their life, and their offspring are likely to remain in that  
96 habitat. In such conditions, local adaptation may be ensured by genetic polymorphism

97 because immigration is rare and the intrapopulation gene pool is highly reliant upon  
98 local recruitment whereat individuals are exposed to local selection pressures giving rise  
99 to different ecotypes. By contrast, wide-dispersing species will experience greater gene  
100 flow and encounter different types of habitats more or less at random, thus experiencing  
101 a fine-grained environment and exhibiting greater genetic homogeneity than in  
102 relatively immobile species. This corresponds to a generalist strategy where phenotypic  
103 plasticity may evolve to cope with heterogeneous environments (Bourdeau et al., 2015;  
104 Chapman, 1995; Conde-Padín, Grahame, & Rolán-Alvarez, 2007; Hollander, Collyer,  
105 Adams, & Johannesson, 2006; Johannesson, 2003; Levins, 1968; Reid, 1996; Vermeij,  
106 1982; Yamada, 1987).

107

108 Temperate marine habitats, in particular the intertidal zone, exhibit great variability in  
109 environmental factors mainly driven by the fall and rise of the tides, creating areas on  
110 the shore that are alternately immersed and exposed (Bourdeau et al., 2015; Denny &  
111 Paine, 1998). The transitional nature of the intertidal habitat from marine to terrestrial  
112 conditions strongly influences the physiology and the ecology of intertidal organisms  
113 due to the increase in environmental harshness (e.g. desiccation, extremes in  
114 temperature and salinity) along the vertical zonation of the intertidal area (Denny &  
115 Paine, 1998; Mouritsen, Sørensen, Poulin, & Fredensborg, 2018; Vermeij, 1972). From  
116 this perspective, intertidal organisms, such as aquatic gastropods, are likely to exhibit  
117 increased phenotypic plasticity in response to such environmental selective pressures  
118 (Berrigan & Scheiner, 2004).

119

120 Phenotypic variation in shell traits is particularly widespread in gastropods (Bourdeau et  
121 al., 2015) and their shells offer an easily measured and permanent record of how the  
122 organism responded to local abiotic (e.g. water chemistry, temperature) and biotic (e.g.  
123 predation, parasitism) agents (Dillon, Jacquemin, & Pyron, 2013). Major environmental  
124 factors as prolonged submersion times, desiccation, high temperature, and extreme  
125 salinity across the vertical zonation create contrasting selective pressures that give rise  
126 to opposite shell trait responses (Johannesson & Johannesson, 1996; Struhsaker, 1968).  
127 For instance, prolonged submersion times enhance foraging times and the absorption of  
128 calcium carbonate from water leading to higher shell growth rates, which result in larger  
129 and narrower shells and increased body mass (Vermeij, 1973; review by Chapman,

130 1995). By contrast, snails from upper intertidal habitats that are periodically exposed to  
131 hot and dry conditions and have only a limited time each day to feed exhibit the  
132 opposite shell and body mass responses and are characterized by having a smaller  
133 aperture size, which has been correlated to an increase in resistance to high desiccation  
134 in upper intertidal habitats (Chapman, 1995; Machin, 1967; Melatunan, Calosi, Rundle,  
135 Widdicombe, & Moody, 2013; Schweizer, Triebkorn, & Köhler, 2019; Vermeij, 1973).

136  
137 Predators are one component of the heterogeneity across the intertidal zone because  
138 they are often distributed patchily in time and space creating a steep selection gradient  
139 in predation risk, which, in turns, can promote an adaptive evolutionary shell response  
140 (Boulding & Hay, 1993; Bourdeau, 2011). Predator-induced plasticity primarily linked  
141 to shell defenses are not limited to shell thickening (more resistant to crushing) as snails  
142 are capable of plastically altering different aspects of their shell shape (i.e. increased  
143 globosity; lower shell length to width ratio) or aperture (i.e. more elongated; higher  
144 aperture length to width ratio), which prevents the crab from pulling the soft parts out of  
145 the shell (Bourdeau et al., 2015; Dillon et al., 2013; Johannesson, 2003). However, not  
146 all phenotypic plasticity triggered by environmental conditions is adaptive. Some plastic  
147 trait responses, usually those imposed by the biochemistry and physiology of the  
148 organism, can be reversed over short time scales, which is not the case for  
149 developmental plasticity as it tends to be irreversible or takes longer to be reversed  
150 (Pigliucci et al., 2006). Parasites, for instance, can induce morphological, behavioral,  
151 and physiological change of individual snail hosts thereby influencing several aspects of  
152 host life history that can significantly alter size-structure, demography, resource-use,  
153 and intra and interspecific interactions of host population (Fredensborg, Mouritsen, &  
154 Poulin, 2005; Miura, Kuris, Torchin, Hechinger, & Chiba, 2006; Mouritsen et al.,  
155 2018). They have been also reported to induce changes in microhabitat choice (Curtis,  
156 1987) and in body size in snails (Alda, Bonel, Cazzaniga, & Martorelli, 2010; Levri,  
157 Dillard, & Martin, 2005; Miura et al., 2006; Mouritsen & Jensen, 1994; Probst & Kube,  
158 1999). Such pressure exerted by parasites also differs along the intertidal zone (Alda et  
159 al., 2010; Alda, Bonel, Cazzaniga, Martorelli, & Lafferty, 2019; Smith, 2001) and can  
160 cause important shifts in the expression of host phenotypic traits, creating pronounced  
161 phenotypic differences between infected and uninfected hosts (Fredensborg, Mouritsen,  
162 & Poulin, 2006; Poulin & Thomas, 1999).

163

164 These contrasting conditions along the vertical distribution pose a particular challenge  
165 for intertidal organisms: the same phenotype is unlikely to perform best regardless of  
166 the types of stress it encounters. We can then have as a result (i) the same phenotype  
167 everywhere (probably with maladaptation), (ii) a phenotypic plasticity promoting  
168 different phenotypes under different conditions, or (iii) a local genetic differentiation,  
169 contributing to the phenotypic variation between habitats, favored by restricted gene  
170 flow through habitat selection (and probably partial genetic isolation leading to  
171 sympatric speciation or cryptic species). Limited gene flow can occur when habitat  
172 conditions disrupt dispersal of planktotrophic larvae thereby increasing localized  
173 recruitment (Johnson, Watts, & Black, 1994) whereat individuals would be subjected to  
174 local (a)biotic selective pressures (Johannesson & Johannesson, 1996; Struhsaker,  
175 1968). Hence, to understand how species meet this challenge, the first step is to observe  
176 phenotypic variation and its association in the field with microhabitats characterized by  
177 different sources of stress. If we observe different morphs associated with different  
178 conditions, the next step is to explore whether such phenotypic variation results from a  
179 direct impact of stress (e.g. trait shift induced by parasites) or is it because we are  
180 dealing with a cryptic or incipient sympatric species that find alternative niches (e.g.  
181 different microhabitats) preventing competition.

182

183 Here we investigated how different selective pressures induced ecological and  
184 phenotypic responses in an intertidal mud snail with planktotrophic larval dispersal. For  
185 our study, we collected and measured external and internal characters, weighted, and  
186 dissected the snail *Heleobia australis* (Rissooidea: Cochliopidae) over the four seasons  
187 throughout a year from three distinct habitats from the intertidal area of the Bahía  
188 Blanca estuary, Southwestern Atlantic, Argentina. The (a)biotically contrasting habitat  
189 conditions of the study area create the potential for niche differences that could affect  
190 snail density and induce different phenotypic responses among individuals from each  
191 subpopulation. Finding strong evidence of phenotypic differentiation in external  
192 characters (shell traits and body mass), we then investigated whether internal characters  
193 as the genital morphology varied among snails from each subpopulation. We found that  
194 juveniles collected from each habitat, and raised in common garden laboratory  
195 conditions until they were adults, showed a remarkable difference in penis size. We also

196 explored whether individuals living in these contrasting habitats belong to the same  
197 species, and not to a species complex, by amplifying the cytochrome oxidase subunit 1  
198 (COI) gene. We confirmed that the individuals here studied constitute a single *Heleobia*  
199 species. Collectively, our findings clearly advocate that the strong phenotypic  
200 differentiation in *H. australis* might have resulted from the combined effect of  
201 directional selection and plasticity that led to the evolution of locally adapted  
202 phenotypes in response to contrasting selection pressures at a local scale.

203

## 204 **Material and Methods**

### 205 **Study species**

206 The intertidal mud snail *Heleobia australis* has a wide geographic range inhabiting  
207 marine and estuarine ecosystems from tropical to temperate regions (from Brazil: 22°  
208 54' S, to Argentina: 40° 84' S; De Francesco & Isla, 2003) and is the most common  
209 benthic macrofaunal species in the estuaries and coastal lagoons. It is a gonochoristic  
210 species with internal fertilization (Neves, Valentin, & Figueiredo, 2010). Mature  
211 females lay egg capsules, containing one fertilized egg (N. Bonel, *personal*  
212 *observation*, but see Neves et al., 2010), preferably on shells of conspecific  
213 individuals, but they may also be laid on shells of other species, on sand grains, or  
214 algae, which later develop into a veliger larva that exhibits a short pelagic larval life  
215 (Neves et al., 2010), which is, on average, 10±3 days in standard laboratory conditions  
216 (12:12 photoperiod, 25 °C, water salinity 30 PSU, and *ad libitum* food in the form of  
217 boiled ground lettuce; N. Bonel *personal observation*). Adult snails attain a maximum  
218 shell size ranging from 7 to 8 mm and individuals have an averaged shell length of 4.7  
219 mm (1.1 SD) with a lifespan of 2.9 years in a temperate climate and two well-defined  
220 recruitment episodes (Carcedo & Fiori, 2012). However, in tropical and subtropical  
221 areas breeding and recruitment occur year-round (Neves et al., 2010) suggesting that it  
222 is likely that *H. australis* have shorter generation times. This species is capable of  
223 creating an air bubble inside its pallial cavity, allowing juveniles and adults to  
224 temporarily float in the water column, whereat they are carried along by the tide and  
225 wind driven current (Echeverría, Neves, Pessoa, & Paiva, 2010), increasing its  
226 dispersion potential. Moreover, *H. australis* is an obligate intermediate host of a large  
227 diversity of parasites that infect several other species hosts. For instance, *H. australis*  
228 has been reported to host 18 larval trematode species and 16 of these were from the

229 Bahía Blanca estuary (Argentina), being all but one parasitic castrators, with an  
230 individual worm eventually filling up the digestive gland and gonad of the snail host  
231 (Alda & Martorelli, 2014).

232

### 233 **Study area and (a)biotically heterogeneous habitats**

234 This study was conducted in the Villa del Mar saltmarsh-mudflat located in the middle  
235 reaches of the Bahía Blanca estuary, Argentina (38° 51' S – 62° 07' W). The intertidal  
236 mudflat extends for more than 1 km across the tidal gradient. Its topography is  
237 characterized by a very gently sloping ramp on the seaward side (Pratolongo, Kirby,  
238 Plater, & Brinson, 2009) and affected by strong semidiurnal tides and high seasonal  
239 variation (Perillo, Piccolo, Parodi, & Freije, 2001). Close to the mean high tide level,  
240 marshes covered by cordgrass (*Spartina alterniflora*) form a narrow, 150 m wide strip  
241 of vegetation followed by a mudflat area with no vegetation (Pratolongo, Perillo, &  
242 Piccolo, 2010). During low tide, these upper areas of the intertidal zone are subjected to  
243 high desiccation and temperature and salinity fluctuations as the tide takes *ca.* 10 hours  
244 to cover them (P. Pratolongo, *personal communication*; 26 February 2019) whereas low  
245 areas located close the seaward edge remain covered by water during low tide.

246

247 The existence of a tidal cycle exposes *H. australis* to extreme, but predictable, changes  
248 in abiotic conditions (at least twice every day) likely determining their vertical  
249 distribution (zonation patterns). Snails in the upper intertidal zone must remain  
250 quiescent for long periods of time during daylight hours or during low tide, being  
251 exposed to aerial conditions for longer periods than individuals in the lower intertidal  
252 zone, which remain cover by water during low tide. The intertidal zone can therefore be  
253 characterized in three distinct habitats: flats, marshes, and pans. Flats and marshes are  
254 located in the upper zone and they drain at low tide, though flats are free of vegetation  
255 and marshes are covered by cordgrass. Pans are free of vegetation but remain covered  
256 by water during low tide and are located close the seaward edge. Thermal, saline, and  
257 dehydration stress are strong selective forces occurring mainly in the upper intertidal  
258 area (flats and marshes; Bourdeau et al., 2015; Denny & Paine, 1998) whereas these  
259 inducing agents are weaker in pans, which exhibit low environmental stress condition  
260 (Fig. S1).

261



262 Biotic agents also vary along the vertical distribution of the intertidal zone (Fig. S1). On  
263 the one hand, the grapsid crab *Neohelice granulata* is one of the most abundant  
264 macroinvertebrates of intertidal areas of the SW Atlantic estuaries where it commonly  
265 inhabits the upper vegetated area (marshes) but uses the entire intertidal zone (Alvarez  
266 et al., 2013; Angeletti & Cervellini, 2015; Angeletti, Lescano, & Cervellini, 2014;  
267 Spivak, Anger, Luppi, Bas, & Ismael, 1994). This burrowing crab could exert a strong  
268 pressure on *Heleobia australis* since it can drastically reduce snail density in vegetated  
269 areas due to an intense bioturbation activity (Alvarez et al., 2013; Angeletti &  
270 Cervellini, 2015; Angeletti et al., 2014; Spivak et al., 1994) and/or through snail  
271 predation (Barutot, D’Incao, & Fonseca, 2011; D’Incao, Silva, Ruffino, & Braga, 1990).  
272 On the other hand, parasite pressure also differs along the intertidal zone. Trematode  
273 infection not only inevitably leads to snail castration reducing its fitness to zero (Alda et  
274 al., 2019) but also gives rise to smaller shell-sized morphs for infected snails (Alda et  
275 al., 2010). The prevalence (percentage of individuals infected) of trematodes is higher in  
276 the lower area of the intertidal zone, where parasite infection is predominately caused  
277 by one extremely prevalent trematode, *Microphallus similimus*. Such pressure is  
278 stronger in pans than in flats and marshes because prolonged submersion times allow  
279 snails to increase time spent foraging and thus ingesting parasite eggs (Alda et al.,  
280 2019).

281

### 282 **Field sampling and laboratory procedure**

283 We sampled individuals of the intertidal mud snail *H. australis* in summer (March 6),  
284 autumn (July 15), winter (September 20), and spring (December 7) of 2012 in a one-  
285 hectare plot. We randomly took nine samples from each habitat (flats, marshes, and  
286 pans) with 10 cm diameter and 2 cm deep circular samplers (Area = 78.5 cm<sup>2</sup>). Snails  
287 were sieved from the sediment through a 1 mm-mesh, then transported alive to the lab,  
288 kept in aquaria, and fed *ad libitum* with flake fish food.

289

290 All 10,367 snails were used to estimate snail density and were also photographed using  
291 a camera attached to a dissecting microscope to analyze shell and aperture  
292 morphometric (see below). A random subset of snails (n = 6,250) was used to account  
293 for infected and uninfected snails (hereafter infection status) in each habitat. The  
294 remaining uncrushed snails were used to estimate snail shell and body weight (n =

295 3,057; see below) and parasite biomass (n = 1,060; N. Bonel and P. Alda, *unpublished*  
296 *data*).

297

### 298 **Snail density and infection status**

299 To test how contrasting habitat conditions affected snail density, we counted all  
300 sampled individuals per habitat and sampling date to analyze spatial and temporal  
301 variation of snail density. Then, to determine infection status, snails from each habitat  
302 were crushed using a mortar and a pestle, tissue was examined under a dissecting  
303 microscope, and trematodes were identified under a compound microscope following  
304 Alda & Martorelli (2014). Previous studies show that the most prevalent parasite in the  
305 study area is *Microphallus simillimus* (Microphallidae), which makes up 87% of the  
306 overall prevalence (Alda et al., 2019; Alda & Martorelli, 2014). This parasite has life  
307 history traits such as abbreviated life cycle (the same snail host can serve as the first-  
308 and second-intermediate host), meaning that once snails ingest parasite eggs, the  
309 metacercariae encyst within the sporocyst in the infected snail, thereby maximizing  
310 transmission success (Alda & Martorelli, 2014). One possible approach to the  
311 contribution of parasites to the phenotypic variance in host populations is to compare  
312 phenotypic responses of uninfected and infected hosts maintained under identical  
313 conditions (Poulin & Thomas, 1999). Thus, to test for this, we only considered snails  
314 infected by the most prevalent trematode *M. simillimus* and also from pans (the habitat  
315 with the highest prevalence; Alda et al., 2019), which implies that both infected and  
316 uninfected snails grew in the same environmental conditions. By doing so, we can  
317 ensure that differences in phenotypic responses can only be attributed to *M. simillimus*  
318 effect and not caused by other trematodes or habitat stress conditions.

319

320 As older hosts have greater cumulative risk of infection than do young hosts, each  
321 sample should be standardized by age, collected at the same time from an area in which  
322 hosts are likely to mingle and where they have experienced relatively uniform risks of  
323 infection (Lafferty, Sammond, & Kuris, 1994). We therefore identified age cohorts by  
324 means of the length-frequency distributions in each sampling date and habitat and  
325 removed those individuals outside the lower 95% confidence limit of the cohort with  
326 larger individuals (see Appendix S1 in Supporting Information, ‘*Snail length-frequency*  
327 *distribution and cohort identification*’ for details; Fig. S2).

328

329 **Shell and aperture morphometric**

330 To analyze variation in shell morphometric across habitat conditions and infection  
331 status, we measured four linear variables from each photograph using ImageJ software:  
332 shell length (SL), shell width (SW), aperture length (AL), and aperture width (AW). We  
333 followed this approach rather than the geometric morphometric analysis because it  
334 allowed us for measuring a larger number of individuals (i.e.; 10,367 snails). Similar to  
335 some other caenogastropod species (e.g. *Littoridina* sp.), the shell of *H. australis* is  
336 generally small and conical and the axis of coiling lying at an angle of about 45° above  
337 the plane of the elliptical aperture (Hershler & Thompson, 1992; Vermeij, 1973). We  
338 thus used SL and SW to calculate the shell size by calculating the volume of a cone:

339

340 
$$\text{Shell size: Volume of a cone} = 1/3 \pi (\text{SW}/2)^2 \text{SL}$$

341

342 To analyze the shell shape, we estimated the SL to SW ratio. Likewise, we analyzed  
343 aperture shape by calculating the AL to AW ratio. We used AL and AW to calculate  
344 aperture size by calculating the area of an ellipse:

345

346 
$$\text{Aperture size: Area of ellipse} = (\text{AL}/2) (\text{AW}/2) \pi$$

347

348 **Shell thickness and body mass**

349 To test whether snails subjected to a stronger predation pressure exhibit thicker shells,  
350 (considered to be a shell defense trait against predators as it is more resistant to  
351 crushing; Bourdeau et al., 2015; Dillon et al., 2013; Johannesson, 2003) and whether  
352 contrasting environmental stress conditions affected body mass, we estimated and  
353 compared shell weight and ash-free dry-weight among habitats. We used a subsample of  
354 individuals (n = 70), representative of the population shell length-frequency  
355 distributions obtained previously for all individuals sampled on each date and habitat.  
356 We removed sediment and epibiota with a scouring pad before weighing and measuring  
357 the organic content of the snail as ash-free dry weight (AFDW, calculated as the  
358 difference between the dry weight and the weight of the incombustible component of  
359 the shell), which was considered as body mass. To achieve this, we dried snails  
360 individually in porcelain crucibles for 48 h at 60 °C, weighed them with a digital scale

361 (precision 0.1 mg), ashed the snails for 5 h in a muffle furnace at 500 °C and then  
362 reweighed them (Bonel & Lorda, 2015). The ash shell weight (the incombustible  
363 component of the shell) was considered to be an equivalent of shell thickness and used  
364 to estimate and compare its variation among individuals along the vertical gradient of  
365 the intertidal area.

366

### 367 **Variation in penis size**

368 To test for differences in genital morphology, we analyzed variation in the penis size  
369 and morphology of individuals from contrasting habitats conditions living in sympatry  
370 but raised in common garden laboratory conditions. We sampled snails of *H. australis*  
371 from the three distinct habitats of the intertidal area of the Villa del Mar saltmarsh-  
372 mudflat in November (Spring) of 2017. Snails were transported to the lab and they were  
373 split into adults and juveniles based on their shell-length distribution (as mentioned  
374 above). Adults were preserved in alcohol 96% and used to conduct molecular analysis.  
375 Juveniles were kept them in three different aquaria (one for each habitat) in common  
376 garden laboratory conditions (12:12 photoperiod, 25 °C, water salinity 30 PSU, and *ad*  
377 *libitum* food in the form of boiled ground lettuce) for 21 months, which ensured that all  
378 individuals considered in the analysis were adults. Prior to dissection, we collected, on  
379 average, 30 snails from each aquaria and preserved them in the Railliet–Henry’s  
380 solution (930 ml distilled water, 6 g NaCl [0.85%], 50 ml formaldehyde [37%], 20 ml  
381 glacial acetic acid). Then, they were all dissected under the dissecting microscope and  
382 the reproductive system of *ca.* 15 males per aquarium was drawn using a camera lucida  
383 attachment (Pointier, Noya, Amarista, & Théron, 2004). These were scanned and the  
384 penis surface area was calculated using the ImageJ software. Shells were photographed  
385 and analyzed as mentioned above to estimate shell size and shape.

386

### 387 **COI analysis**

388 To confirm that individuals living in these contrasting habitats belong to the same  
389 species and not to a species complex, we conducted molecular analyses by amplifying  
390 the cytochrome oxidase subunit 1 (COI) gene in 10 individuals sampled from each of  
391 the three sites. Then, we built a gene tree and a haplotype network to verify if  
392 individuals gather in clusters depending on the habitat they come from. We also applied  
393 a species-delimitation method: Automatic Barcode Gap Detection (ABGD; Puillandre,

394 Lambert, Brouillet, & Achaz, 2012). ABGD detects barcode gaps, which can be  
395 observed whenever the divergence among organisms belonging to the same species is  
396 smaller than divergence among organisms from different species (see Supporting  
397 Information for specific details on these procedures).

398

### 399 **Statistical analyses**

400 To test for spatial and temporal variation of snail density, we performed a two-way  
401 ANOVA including habitats (flats, marshes, and pans) and seasons (summer, autumn,  
402 winter, spring) as fixed effect, and their interaction. We transformed density (natural-  
403 log) data to meet assumptions of normality and homoscedasticity.

404

405 To test for phenotypic variation in shell characters, we defined three categories (cat.) of  
406 snails that comprised: (i) uninfected adults, (ii) infected adults, and (iii) uninfected  
407 juveniles. These three categories (cat. *i-iii*) were considered to test whether contrasting  
408 (a)biotic stress conditions (environmental stress and crab predation) induced variation in  
409 shell traits (morphometric and thickness) and body mass. To evaluate the effect exerted  
410 by the trematode *Microphallus similimus* on shell morphometry of *Heleobia australis*  
411 from pans (the habitat with the highest prevalence), we created a fourth category that  
412 included uninfected and infected adult snails (cat. *iv*). We performed four Principal  
413 Components Analyses (PCAs) to visualize the main components of the morphological  
414 shell variation for each snail category. Then, we tested for differences in shell  
415 morphology (size and shape of the shell and aperture) by fitting independent linear  
416 mixed models (LMMs), with a Gaussian error distribution, for the above-mentioned  
417 four categories (cat. *i-iv*).

418

419 To test the effect of habitat conditions on shell traits (cat. *i-iii*), we considered habitat as  
420 a fixed effect. To test for morphometric differences between infected and uninfected  
421 (cat. *iv*), we included infection status (infected and uninfected) as a fixed effect as we  
422 only considered individuals from one habitat (i.e. same habitat conditions for infected  
423 and uninfected snails). For all the four categories (cat. *i-iv*), we included sex (male and  
424 female) as a fixed factor (and its interaction with infection status or habitat). We added  
425 sampling season as a random factor in all models as it can explain a significant portion  
426 of the variance in measured variables. Likewise, we also considered shell size as a

427 covariate when testing for shell and aperture shape, but the models were all ran with and  
428 without this effect to check the extent to which the effects were mediated by shell size.  
429 We also incorporated shell size as a covariate when testing for shell thickness and body  
430 weight (by means of LMMs) and estimates were statistically corrected for variation that  
431 could be explained by the covariate. Statistical significance of the fixed effects was  
432 obtained from model comparisons using likelihood-ratio tests. Random effects were  
433 separately tested using chi-square likelihood-ratio tests with the corrections indicated by  
434 Zuur (2009). To test for differences in penis size (area of the penis), we performed a  
435 linear model with habitat as a factor and we added shell size (volume) as a covariate,  
436 which was used to statistically correct estimates for variation explained by the covariate.  
437 All individuals analyzed were free of parasites, meaning that the differences found are  
438 not due to parasite effect.

439

440 Post-hoc tests were performed when the effects were significant ( $P < 0.05$ ), using Holm-  
441 Bonferroni correction for multiple testing to compare their effects. Values are given as  
442 means  $\pm$  1 SE unless otherwise stated. All analyses and figures were performed with R  
443 v.3.3.3 packages *lme4* (Bates, Mächler, Bolker, & Walker, 2014), *nlme* (Pinheiro, Bates,  
444 DebRoy, Sarkar, & R Core Team, 2017), *car* (Fox et al., 2011), *effects* (Fox, 2003),  
445 *MASS* (Ripley et al., 2013), *plyr* (Wickham, 2011), *dplyr* (Wickham, François, Henry,  
446 & Müller, 2019), *devtools* (Wickham, Hester, & Chang, 2019), *ggbiplot* (Vu, 2011),  
447 *psych* (Revelle, 2018), *ggplot2* (Wickham & Chang, 2008), and *outliers* (Komsta,  
448 2011).

449

## 450 **Results**

### 451 **Overview**

452 Overall, the mud snail *Heleobia australis* showed a strong variation in snail density and  
453 a remarkable variation in several traits linked to contrasting (a)biotic selective pressures  
454 (environmental stress, predation, or parasite infection) occurring along the vertical  
455 zonation of the intertidal area. Tables 1 to 3 summarize descriptive statistics on density  
456 and shell traits measured for the first and fourth snail categories (cat. *i* and *iv*). In the  
457 appendix, we reported results of the snail density split by age classes (juvenile and  
458 adult; Table S1), principal components analyses (Table S2), descriptive statistics and

459 the linear mixed models for the four snail categories on shell traits (Tables S3–S8) and  
460 for shell weight and body mass (Table S9).

461

#### 462 **Strong habitat and seasonal effect on snail density**

463 We found spatial differences in total density (including juveniles and adult snails; Table  
464 1; Fig. 1). We observed no significant interaction between habitats and seasons ( $F_{(6, 106)}$   
465  $= 1.56$ ,  $P = 0.167$ ). Marshes showed the lowest density whereas flats and pans showed a  
466 marginal non-significant difference (Table 1). We found significant differences between  
467 seasons (Table 1). Density was higher in spring than in autumn, winter, and summer  
468 (Table 1). Snail density in autumn did not differ from that of summer or winter, these  
469 latter two being not different either (Table 1), but it largely increased from autumn to  
470 spring (particularly in pans as compared to flats and marshes). This increase across  
471 seasons was mainly driven by juvenile recruitment (Table S1; Fig. S3). By contrast, the  
472 effect of habitat conditions and seasons on adult density showed a significant interaction  
473 because density was higher in pans from autumn to winter whereas it decreased in  
474 marshes for the same period, and in flats it decreased from summer to autumn and the  
475 than remained fairly constant (Table S1; Fig. S3).

476

#### 477 **Main components of the morphological shell variation within each snail group**

478 For each of the snail categories (cat. *i–iv*), principal component analyses decomposed  
479 the shell morphometric measures (shell and apertures size and shape) into four principal  
480 components of which the first two explained, overall, more than 73% of the variance in  
481 the original data (Table S2; Fig. S4). The component loadings showed that the shell and  
482 aperture size are highly correlated one another and with PC1, whereas PC2 highly  
483 contrast shell shape with aperture shape. In other words, the first component was  
484 strongly correlated with size indices, and the second component with shape (further  
485 details in Table S2). The distribution of individual data points from flats and marshes  
486 highly overlapped, and this was consistent in all the three snail categories (cat. *i–iii*).  
487 This constituted one group that clearly differed from the other group of data points that  
488 was composed by individual observations from pans (Fig. S2). Likewise, the scatter of  
489 the data showed two groups when decomposing the variation of morphometric measures  
490 between infected and uninfected adult snails (cat. *iv*).

491

492 **Strong habitat effect on shell morphometric**

493 The morphometric responses to habitat conditions were similar in all the three snail  
494 categories analyzed (cat. *i–iii*). For simplicity, we present results and figures only for  
495 uninfected adult snails (cat. *i*) in the main text and those for infected adults (cat. *ii*) and  
496 juvenile snails (cat. *iii*) are shown in Supporting Information (Tables S4-S7; Figs. S5-  
497 S6).

498  
499 ***Shell size***

500 We found a significant interaction between fixed effects (habitat and sex;  $X^2_2 = 8.42$ ,  $P$   
501  $= 0.015$ ). This was mainly driven by differences in this trait between sexes in pans,  
502 whereas such difference between males and females was not detected in snails from  
503 flats and marshes. In other words, males exhibited a larger shell size ( $\text{mm}^3$ ) compared to  
504 females in pans, meaning that the sex effect was much stronger in creating size  
505 differences between sexes compared to flats and marshes where the sex effect was  
506 weaker resulting in no difference in size between sexes. By contrast, the effect of habitat  
507 conditions was stronger in both sexes. Both male and female snails from flats and  
508 marshes showed a smaller shell size (a decrease of 12 and 22 % in shell size;  
509 respectively) relative to individuals from pans (Tables 2 and S3; Fig. 2).

510

511 ***Shell shape***

512 The interaction between fixed effects was significant ( $X^2_2 = 8.20$ ,  $P = 0.017$ ), but when  
513 we statistically corrected for shell size, it became marginally non-significant ( $X^2_2 =$   
514  $5.69$ ,  $P = 0.058$ ). Snails from pans (sex pooled) exhibited the most elongated shells  
515 relative to individuals from marshes and flats. At the sex level (habitats pooled), males  
516 had a more elongated shell shape than females (Table 2 and S3; Fig. 2).

517

518 ***Aperture size***

519 We found a strong habitat and sex effect on aperture size; the interaction between these  
520 variables was not significant ( $X^2_2 = 3.05$ ,  $P = 0.217$ ). Across habitats (sex pooled),  
521 snails from pans showed the largest aperture size ( $\text{mm}^2$ ) whereas in flats and marshes it  
522 was 9 to 12% smaller, respectively. Moreover, we observed a significant difference in  
523 aperture size between sexes (habitats pooled), males had bigger apertures than females  
524 and this difference was consistent across habitats (Table 2 and S3; Fig. 2).



525

526 ***Aperture shape***

527 We found no significant difference in aperture shape between sexes ( $X^2_1 = 0.65$ ,  $P =$   
528  $0.724$ ), and this pattern was similar even after correcting for shell size ( $X^2_2 = 2.20$ ,  $P =$   
529  $0.333$ ). However, individuals from pans (sex pooled) showed the most rounded shape  
530 relative to those from flats and marshes, which showed a more elongated aperture shape  
531 (Table 2 and S3; Fig. 2).

532

533 **Pronounced trematode effect on shell morphometric**

534 Infection caused by the trematode *M. simillimus* strongly shifted the mean value of most  
535 phenotypic traits of *H. australis* to lower values when comparing infected and  
536 uninfected snails from pans.

537

538 ***Shell size***

539 Shell size of infected snails (sex pooled) decreased 10% relative to uninfected ones,  
540 whereas females (infection status pooled) were 5% smaller than males (Table 3; Fig. 3).  
541 We found no significant interaction between the fixed effects (status and sex;  $X^2_1 =$   
542  $0.70$ ,  $P = 0.402$ ).

543

544 ***Shell shape***

545 We found a significant interaction between status and sex ( $X^2_1 = 15.86$ ,  $P < 0.001$ ). This  
546 was because, at the status level, uninfected males were more elongated (or exhibited  
547 higher SL to SW ratio) than uninfected females, but infected males and females showed  
548 no difference in shell shape. We found the same pattern at the sex level; that is, infected  
549 male and female snails have a more elongated shell relative to uninfected male and  
550 female individuals (Table 3; Fig. 3).

551

552 ***Aperture size***

553 We observed a strong effect of infection status and sex in aperture size. Infected snails  
554 (sex pooled) and females (status pooled) had a smaller aperture than uninfected and  
555 male snails (15 and 3% respectively; Table 3; Fig. 3). We found no significant  
556 interaction between fixed effects ( $X^2_1 = 2e-04$ ,  $P = 0.990$ ).

557

558 ***Aperture shape***

559 Uninfected snails exhibited a more elongate aperture shape (higher AL to AW ratio)  
560 than infected individuals whereas we found no sex effect on this shell trait (Table 3;  
561 Fig. 3). We found no significant interaction between fixed effects and no sex effect on  
562 aperture shape, even after correcting by shell size ( $X^2_1 = 0.33$ ,  $P = 0.564$ ).

563

564 **Thicker shells and lower body mass in habitats with high (a)biotic stress**

565 We found that snails differed in shell weight (~ thickness) across habitats ( $X^2_2 = 48.93$ ,  
566  $P < 0.001$ ). Snails from pans showed the thinnest shells ( $11.53 \pm 0.23$  mg) compared to  
567 snails from marshes ( $12.54 \pm 0.15$  mg;  $P_{\text{Pans} < \text{Marshes}} < 0.001$ ) and flats ( $12.00 \pm 0.15$  mg;  
568  $P_{\text{Pans} < \text{Flats}} = 0.001$ ). By contrast, in marshes individuals showed the heaviest/thickest  
569 shells ( $P_{\text{Marshes} > \text{Flats}} < 0.001$ ; Fig. 4). Body mass also differed across habitats ( $X^2_2 = 19.67$ ,  
570  $P < 0.001$ ). Snails from pans exhibited the heaviest body mass ( $0.50 \pm 0.05$  mg) relative  
571 to individuals from marshes ( $0.32 \pm 0.03$  mg) and flats ( $0.33 \pm 0.04$  mg) ( $P_{\text{Pans} > \text{Marshes}}$   
572  $< 0.001$ ;  $P_{\text{Pans} > \text{Flats}} < 0.001$ ), which showed no differences in body weight ( $P_{\text{Marshes} < \text{Flats}} =$   
573  $0.390$ ; Fig. 4). Further details on observations, corrected and uncorrected mean values,  
574 and statistics are indicated in the appendix (Table S9; Fig. S7).

575

576 **Variation in penis size**

577 The penis shape confirmed that individuals from each habitat of the Bahía Blanca  
578 estuary belong to the same species (Fig. S8; Gaillard & Castellanos, 1976). We found,  
579 however, a clear difference in penis size ( $F_{(2, 39)} = 8.42$ ,  $P < 0.001$ ). Individuals from  
580 marshes showed the largest size relative to flats ( $P_{\text{flats} < \text{marshes}} < 0.001$ ) and pans  
581 ( $P_{\text{pans} < \text{marshes}} = 0.034$ ); snails collected from these two habitats showed a marginal non-  
582 significant difference ( $P_{\text{flats} < \text{pans}} = 0.090$ ; Fig. 5). We found no significant effect of shell  
583 size, meaning that differences in penis size were not due differences in individual's shell  
584 size ( $F_{(1, 39)} = 0.27$ ,  $P = 0.608$ ). Further, we found no differences in shell shape, even after  
585 controlling by shell size ( $F_{(2, 43)} = 0.851$ ,  $P = 0.435$ ).

586

587 **Molecular analysis of the cytochrome oxidase subunit 1 (COI) gene**

588 The species-delimitation analysis implemented in ABGD found only one partition (prior  
589 maximal distance,  $P = 0.001$ ) that confirmed that the individuals here studied constitute a  
590 single *Heleobia* species, which is in agreement with the similar penis shape found

591 among habitats. In fact, we did not observe any type of structure among individuals.  
592 The gene tree and haplotype network showed that individuals did not gather in clusters  
593 depending on the habitat they come from (Figs. S9-S10).

594

## 595 **Discussion**

596 This study provides clear evidence of ecological and phenotypic trait variation in  
597 response to contrasting biotic and abiotic conditions at a local scale. Snail density and  
598 most of mean values of phenotypic traits measured shifted to lower values in habitats  
599 with high physical stress conditions (flats and marshes), crab-predation (marshes), and  
600 parasite (pans) pressure (summarized in Fig. 6). The pronounced phenotypic  
601 differentiation in *Heleobia australis* is all the more remarkable because it occurred at a  
602 very small geographical scale, which is rarely documented for a wide-dispersing  
603 species. These findings support the standpoint that this species might have experienced  
604 a fine-grained environment where the combined effect of directional selection and  
605 plasticity led to the evolution of locally adapted phenotypes in response to contrasting  
606 selection pressures.

607

### 608 **Reduced snail density under high environmental and predatory stress**

609 Density of *Heleobia australis* was the lowest in marshes (vegetated area that drains at  
610 low tide) relative to flats (unvegetated area that drains at low tide) and pans (covered by  
611 water at low tide) whereas flats and pans showed no difference. However, when  
612 analyzed by age classes, adult density was higher in pans during winter but remarkably  
613 low in marshes, even compared to flats (both habitats from the upper area). This is  
614 consistent with the idea that prolonged submersion times could increase the survival  
615 rate of snails during harsh climatic conditions (Fig. S3). As for juvenile snails, their  
616 density increased during winter season in all the three habitats (Fig. S3). This was  
617 somehow unexpected as we hypothesized that intense environmental stress in the upper  
618 area of the intertidal zone, combined with harsh climatic conditions, could strongly  
619 decrease their survival rate affecting their abundance. It is puzzling, however, that  
620 density in marshes was low relative to flats because *H. australis* is positively associated  
621 to marsh plants (the smooth cordgrass *Spartina alterniflora*, which dominates the lower  
622 marsh), as they buffer physical stress factors (thermal and dehydration stress) relative to

623 uncovered areas, promoting snail aggregation (Canepuccia et al., 2007 and references  
624 therein).

625

626 One possible explanation for the low density in marshes, relative to flats, is if this  
627 resulted from a negative interaction between *H. australis* and the grapsid crab *Neohelice*  
628 *granulata*, whose aggregation is also facilitated by marsh plants (Alvarez et al., 2013;  
629 Angeletti & Cervellini, 2015; Angeletti et al., 2014; Spivak et al., 1994) where it attains  
630 density peaks in late spring and early summer but it is absent throughout the year in  
631 unvegetated areas (flats or pans; Angeletti & Cervellini, 2015). It is therefore likely that  
632 the low density of *H. australis* in vegetated crab-rich habitats resulted from an increased  
633 bioturbation activity caused by *N. granulata*, particularly during that period of time  
634 (Alvarez et al., 2013). Another mutually non-exclusive hypothesis is that this difference  
635 between marshes and flats could result from a higher predation pressure caused by this  
636 crab (Barutot et al., 2011; D’Incao et al., 1990), in which case it might have induced  
637 predatory shell defenses as shell thickening or narrower apertures (Boulding & Hay,  
638 1993; Johannesson & Johannesson, 1996; Rolán-Alvarez, 2007; review by Bourdeau et  
639 al., 2015). Accordingly, snail from marshes exhibited a strong variation in shell  
640 characters that support this hypothesis, which we discuss later in this section.

641

642 **Snails exhibited larger, narrower, and thinner shells and heavier body mass in**  
643 **habitats with low stress conditions**

644 Snails subjected to different levels of stress showed a strong phenotypic variation. In all  
645 categories analyzed (cat. *i-iii*), individuals showed a clear shift in their phenotype likely  
646 in response to different selective pressures. Overall, the distribution of trait values  
647 tended to represent two distinct groups, one for flats and marshes and another for pans.  
648 Such responses seem to be primarily linked to the level of exposure to physical stress  
649 (temperature and salinity fluctuation and desiccation) of individuals during low tide.  
650 Prolonged submersion times enhance foraging times and the absorption of calcium  
651 carbonate from water increasing shell growth rate, which, in turn, gives rise to larger but  
652 more elongated shells (review by Chapman, 1995). As there is a maximal rate at which  
653 calcium carbonate can be absorbed from the water, rapidly growing individuals produce  
654 thinner shells for the same amount of body weight than slower growing individuals.  
655 This results in a larger internal volume allowing for accommodating a higher body

656 mass, which is related to higher growth rate favored by longer foraging times  
657 (Chapman, 1995; Kemp & Bertness, 1984; Palmer, 1981; Trussell, 2000a).  
658 Accordingly, snails that remain covered by water during low tide (pans) showed larger,  
659 narrower, and thinner shells and heavier body mass relative to individuals from habitats  
660 with high environmental stress conditions (flats and marshes). As higher body weight is  
661 directly linked to higher fecundity (i.e. egg production; Fredensborg et al., 2006), it is  
662 therefore likely that the heaviest body weight of individuals from pans is related to a  
663 higher recruitment, which would explain the increased juvenile abundance compared to  
664 flats and marshes (Fig. S3).

665  
666 Juvenile and adult snails from flats and marshes showed a smaller aperture size (smaller  
667 aperture surface area) with respect to individuals from pans. It could be that higher  
668 environmental stress conditions favored the expression of a smaller aperture size as a  
669 potentially beneficial trait increasing resistance to high desiccation in these habitats that  
670 drain at low tide. This is consistent with other studies showing that the size of the shell  
671 aperture in gastropods is smaller in response to hot and dry conditions (Chapman, 1995;  
672 Machin, 1967; Melatunan et al., 2013; Schweizer et al., 2019; Vermeij, 1973).  
673 Moreover, individuals from flats and marshes showed thicker shells and lower body  
674 mass. Shell thickening could be due to a higher deposition of calcium carbonate at a  
675 slow grow rate (likely in response to unfavorable conditions in more exposed habitats  
676 from the upper intertidal) that traded off against investment in body mass.

677

678 **Crab predation pressure would favor the expression of shell defenses in *Heleobia***  
679 ***australis***

680 Snails from marshes showed a more rounded and thicker shell, reduced body mass, and  
681 a narrow aperture shape for three snail categories analyzed (cat. *i-iii*). Such  
682 characteristics are consistent with shell defenses probably induced by the high presence  
683 of the predatory crab *Neohelice granulata* in that habitat in particular (e.g. Appleton &  
684 Palmer, 1988; Bourdeau et al., 2015; Palmer, 1990). Considering that crushing  
685 predators exert a strong selective pressure driving the evolution of behavioral, chemical,  
686 and morphological defense traits (Appleton & Palmer, 1988; Bourdeau et al., 2015;  
687 Johannesson, 2003; Palmer, 1990; Trussell, 2000b), our results, combined with its  
688 remarkably low density, support the hypothesis that predation pressure is stronger in

689 marshes than in flats and pans. Yet, specific information on whether crabs actively  
690 predate on *H. australis* is limited or inexistent. Earlier studies reported that *N.*  
691 *granulata* consumes mollusks but in a low frequency (Barutot et al., 2011; D’Incao et  
692 al., 1990). These studies, however, have used visual examination of gut/stomach  
693 contents. This procedure may have under-estimated true predation levels as crabs only  
694 eat the soft tissue after crushing/peeling the shell whereby the remains found in guts or  
695 stomach become unidentifiable due to maceration and digestion. Thus, further studies  
696 using molecular-based tools are needed for detecting the presence of *Heleobia*’s tissue  
697 in crab’s stomachs as an alternative or complementary approach to visual identification  
698 (e.g. Albaina et al., 2010; Collier, Fitzgerald, Hice, Frisk, & McElroy, 2014). By doing  
699 so, we would be able to establish the trophic link between these two species that is  
700 highly likely to exist. Evidence found in this study clearly reveals that *H. australis*  
701 phenotypically responded to the presence of predatory crabs, likely even early in life, as  
702 juveniles from marshes also showed a narrow aperture shape and a more rounded shell.  
703 Our results therefore warrant further investigation to understand the adaptive value of  
704 the plastic shell responses of gastropods induced by predators.

705

706 **Strong parasite effect on shell characters: a trade-off between growth and early**  
707 **reproduction**

708 Infected and uninfected snails from pans showed a clear phenotypic differentiation in  
709 shell traits. Trematode infection inevitably leads to snail host castration drastically  
710 reducing host fitness, which, in evolutionary terms, is equivalent to death of the host  
711 (Fredensborg et al., 2006; Lafferty, 1993). In this sense, being castrated by a parasite is  
712 similar as being eaten by a predator (Kuris, 1974). This means that parasitic castrators  
713 can exert a strong selective force that could favor the expression of behavioral,  
714 physiological, and morphological adaptations to minimize the negative impact of  
715 parasitism on host fitness (Lafferty, 1993). Early maturation, which results from fast  
716 growing individuals, is an effective strategy that increases current reproductive effort  
717 over future reproduction (Cole, 1954; Lewontin, 1965; Roff, 1992) which equals to 0 in  
718 castrated hosts. In *Heleobia*, castration caused by *Microphallus* can have a profound  
719 impact on snail fitness as this parasite shows an extensive host exploitation occupying  
720 the entire gonad and most of digestive gland (see Fig. S2 in Alda et al., 2019). Our  
721 results showed that infected snails had a more elongated shell shape but a smaller size

722 compared to uninfected snails. Despite infected snails were smaller, they exhibited the  
723 same number of whorls (six) as uninfected snails, which indicates that individuals  
724 analyzed were adults (Gaillard & Castellanos 1976). It could therefore be that the  
725 elongated shape resulted from an initial higher growth rate (review by Chapman, 1995)  
726 likely followed by an energy reallocation from growth to early reproduction (Agnew,  
727 Bedhomme, Haussy, & Michalakis, 1999; Lafferty, 1993), which could explain the  
728 smaller shell size compared to uninfected snails (Alda et al., 2010, 2019; this study).  
729 Infected snails also showed a smaller aperture size but a more rounded shape relative to  
730 uninfected individuals. This change in aperture size and shape could be a side effect of  
731 selection for high rate of shell growth (Boulding & Hay, 1993) induced by parasites.  
732 Together, these findings support the idea that infection by trematodes exerted a strong  
733 selective pressure on the snail host causing important shifts in the expression of shell  
734 traits towards lower mean values, creating a pronounced phenotypic difference between  
735 infected and uninfected snails (Poulin & Thomas, 1999).

736

#### 737 **Difference in penis size in a single *Heleobia* species**

738 Interestingly, individuals from each habitat showed a clear variation in penis size, which  
739 is all the more remarkable as they were raised in common garden laboratory conditions  
740 (no habitat effect) and, when dissected, we observed that none of them was infected by  
741 parasites (no parasite effect). It could be that this variation resulted from different  
742 growth rates as well as the differences in shell shape observed for wild snails. However,  
743 we found no differences in shell shape, even after controlling by shell size, among male  
744 individuals reared in laboratory conditions. This result suggests that the differences in  
745 penis size might not be related to differences in growth rate. Future studies are therefore  
746 needed to exclude other processes (e.g. genetic differences) that may have contributed  
747 to this difference in penis size and to understand whether this genital divergence could  
748 be an indicative of pre-zygotic reproductive isolation among subpopulations of  
749 *Heleobia australis* living in sympatry (Hollander, Smadja, Butlin, & Reid, 2013;  
750 Kameda, Kawakita, & Kato, 2009). Despite the difference in size, its shape indicates  
751 that individuals from each subpopulation belong to the same species, more specifically  
752 to *Heleobia australis australis* (see Gaillard & Castellanos, 1976 for further detail on  
753 taxonomy). Accordingly, the protein-coding COI gene confirmed that specimens  
754 considered in this study constitute a single species.

755

756 **Does the pronounced phenotypic differentiation in *Heleobia australis* reflect an**  
757 **adaptive evolutionary response to local selection pressures?**

758 The intertidal mud snail *H. australis* exhibited a strong phenotypic variation in shell  
759 morphology and other characteristics associated to contrasting biotic (parasitism and  
760 predation) and abiotic (high temperature, salinity, and desiccation stress) factors among  
761 habitats that are separated just a few meters away from each other within the intertidal  
762 area. Such phenotypic differentiation at a very small geographical scale has been rarely  
763 documented for a natural population of a wide-dispersing species. It does seem  
764 reasonable to interpret the observed variation as an adaptive phenotypic response to  
765 contrasting selection pressures occurring along the vertical gradient of the intertidal area  
766 (Levins, 1968; Pigliucci, 2001). Environmentally-induced phenotypic change has been  
767 reported for a large number of snail species (review by Bourdeau et al., 2015). The  
768 appearance of an environmentally induced novel phenotype relies on plasticity unique  
769 ability to generate an immediate phenotypic response to the surrounding habitat  
770 conditions (West-Eberhard, 2003). If genetic variation in plasticity exists (or arises),  
771 then an environmentally induced novel phenotype can be refined by selection on the  
772 expression of such phenotype through processes such as genetic accommodation or  
773 assimilation (see Pigliucci et al., 2006; Waddington, 1953; West-Eberhard, 1989, 2003,  
774 2005 for further details). Both processes are potentially relevant in fostering divergent  
775 phenotypes within populations and subsequently driving diversification (e.g. Pfennig et  
776 al., 2010 and references therein; Suzuki & Nijhout, 2006; West-Eberhard, 2003, 2005).  
777 Multilocus or genomic analyses are therefore needed to unveil whether the phenotypic  
778 differentiation of external and internal characters might have become genetically  
779 assimilated, likely due to by local disruption to dispersal caused by environmental stress  
780 conditions thereby increasing localized recruitment (e.g. Parsons, 1997; Struhsaker,  
781 1968). If so, the individuals studied herein would be part of a species complex that have  
782 recently diverged, which would explain why individuals showed, for instance,  
783 differences in the genital morphology but did not cluster when analyzing the conserved  
784 COI gene (Janzen et al., 2017; Matos & Maraví, Wahlberg, Antonelli, & Penz, 2019).

785

786 **Conclusion**



787 Our results show a remarkable shift in the expression of phenotypic traits, even early in  
788 life, in response to strong selective pressures exerted by biotic (parasites, predation) and  
789 abiotic (temperature, salinity, desiccation) stressors, which also affected ecological  
790 processes such as snail density (summarized in Fig. 6) in a natural population at a very  
791 small geographical scale. While this study was not designed to test for an adaptive basis  
792 to phenotypic variation, these findings provide a reasonable ground for advocating that  
793 *H. australis* benefited from the combined effect of directional selection (likely through  
794 genetic assimilation) and plasticity to evolve locally adapted phenotypes to contrasting  
795 habitat conditions. The demonstration of the adaptive nature of these differences in life  
796 history features will be the object of a future study.

797

## 798 **Acknowledgements**

799 We would like to express our gratitude to Kevin Lafferty, Patrice David, Antonio A.  
800 Vazquez Perera, Philippe Jarne, and Romain Villoutreix for their constructive  
801 suggestions on earlier versions of the manuscript. We also thank Leandro A. Hünicken  
802 and Micaela Folino for field and laboratory assistance and to Néstor J. Cazzaniga for  
803 providing insightful comments on the systematics of *Heleobia* group. This work was  
804 partially funded by a research grant from the Universidad Nacional del Sur (UNS  
805 24/B153 and UNS 24/B199). NB was partially supported by the “Programa de  
806 Financiamiento Parcial de Estadías en el Exterior para Investigadores Asistentes”,  
807 National Scientific and Technical Research Council CONICET (Res. N° 558 1236/08;  
808 4118/16”).

809

## 810 **Authors’ contributions**

811 NB and PA conceived the ideas and designed methodology; NB, JPP, and PA collected  
812 the data; NB analyzed the data and led the writing of the manuscript. All authors  
813 contributed critically to the drafts and gave final approval for publication.

814

## 815 **References**

- 816 Agnew, P., Bedhomme, S., Haussy, C., & Michalakis, Y. (1999). Age and size at maturity of  
817 the mosquito *Culex pipiens* infected by the microsporidian parasite *Vavraia culicis*. *Proceedings*  
818 *of the Royal Society of London. Series B: Biological Sciences*, 266(1422), 947–952. doi:  
819 10.1098/rspb.1999.0728
- 820 Albaina, A., Fox, C. J., Taylor, N., Hunter, E., Maillard, M., & Taylor, M. I. (2010). A TaqMan

- 821 real-time PCR based assay targeting plaice (*Pleuronectes platessa* L.) DNA to detect predation  
822 by the brown shrimp (*Crangon crangon* L.) and the shore crab (*Carcinus maenas* L.)—Assay  
823 development and validation. *Journal of Experimental Marine Biology and Ecology*, 391(1–2),  
824 178–189. doi: 10.1016/j.jembe.2010.06.029
- 825 Alda, P., Bonel, N., Cazzaniga, N. J., & Martorelli, S. R. (2010). Effects of parasitism and  
826 environment on shell size of the South American intertidal mud snail *Heleobia australis*  
827 (Gastropoda). *Estuarine, Coastal and Shelf Science*, 87(2), 305–310. doi:  
828 10.1016/j.ecss.2010.01.012
- 829 Alda, P., Bonel, N., Cazzaniga, N. J., Martorelli, S. R., & Lafferty, K. D. (2019). A strong  
830 colonizer rules the trematode guild in an intertidal snail host. *Ecology*, e02696. doi:  
831 10.1002/ecy.2696
- 832 Alda, P., & Martorelli, S. (2014). Larval trematodes infecting the South-American intertidal  
833 mud snail *Heleobia australis* (Rissooidea: Cochliopidae). *Acta Parasitologica*, 59(1). doi:  
834 10.2478/s11686-014-0209-3
- 835 Alvarez, M. F., Esquius, K. S., Addino, M., Alberti, J., Iribarne, O., & Botto, F. (2013).  
836 Cascading top-down effects on estuarine intertidal meiofaunal and algal assemblages. *Journal*  
837 *of Experimental Marine Biology and Ecology*, 440, 216–224. doi: 10.1016/j.jembe.2012.12.015
- 838 Angeletti, S., & Cervellini, P. M. (2015). Population structure of the burrowing crab *Neohelice*  
839 *granulata* (Brachyura, Varunidae) in a southwestern Atlantic salt marsh. *Latin American Journal*  
840 *of Aquatic Research*, 43(3), 539–547.
- 841 Angeletti, S., Lescano, L., & Cervellini, P. (2014). Caracterización biosedimentológica y  
842 mineralógica de dos sectores intermareales del estuario de Bahía Blanca. *GeoActa*, 39(2), 54–  
843 67.
- 844 Appleton, R. D., & Palmer, A. R. (1988). Water-borne stimuli released by predatory crabs and  
845 damaged prey induce more predator-resistant shells in a marine gastropod. *Proceedings of the*  
846 *National Academy of Sciences*, 85(12), 4387–4391. doi: 10.1073/pnas.85.12.4387
- 847 Barutot, R. A., D’Incao, F., & Fonseca, D. B. (2011). Natural diet of *Neohelice granulata* (Dana,  
848 1851) (Crustacea, Varunidae) in two salt marshes of the estuarine region of the Lagoa dos Patos  
849 lagoon. *Brazilian Archives of Biology and Technology*, 54(1), 91–98. doi: 10.1590/S1516-  
850 89132011000100012
- 851 Bates, D., Mächler, M., Bolker, B., & Walker, S. (2014). Fitting Linear Mixed-Effects Models  
852 using lme4. *ArXiv:1406.5823 [Stat]*. Retrieved from <http://arxiv.org/abs/1406.5823>
- 853 Berrigan, D., & Scheiner, S. (2004). Modeling the evolution of phenotypic plasticity. In  
854 *Phenotypic plasticity: Functional and conceptual approaches* (DeWitt TJ, Scheiner, SM (eds),  
855 pp. 82–97). New York: Oxford, Univ. Press.
- 856 Bonel, N., & Lorda, J. (2015). Growth and Bbody weight variability of the invasive mussel  
857 *Limnoperna fortunei* (Mytilidae) across habitat and season. *Malacologia*, 58(1–2), 129–145.  
858 doi: 10.4002/040.058.0202
- 859 Boulding, E. G., & Hay, T. K. (1993). Quantitative genetics of shell form of an intertidal snail:  
860 constraints on short-term response to selection. *Evolution*, 47(2), 576. doi: 10.2307/2410072
- 861 Bourdeau, P E, Butlin, R. K., Brönmark, C., Edgell, T. C., Hoverman, J. T., & Hollander, J.  
862 (2015). What can aquatic gastropods tell us about phenotypic plasticity? A review and meta-

- 863 analysis. *Heredity*, 115(4), 312–321. doi: 10.1038/hdy.2015.58
- 864 Bourdeau, Paul E. (2011). Constitutive and inducible defensive traits in co-occurring marine  
865 snails distributed across a vertical rocky intertidal gradient. *Functional Ecology*, 25(1), 177–  
866 185. doi: 10.1111/j.1365-2435.2010.01762.x
- 867 Canepuccia, A. D., Escapa, M., Daleo, P., Alberti, J., Botto, F., & Iribarne, O. O. (2007).  
868 Positive interactions of the smooth cordgrass *Spartina alterniflora* on the mud snail *Heleobia*  
869 *australis*, in South Western Atlantic salt marshes. *Journal of Experimental Marine Biology and*  
870 *Ecology*, 353(2), 180–190. doi: 10.1016/j.jembe.2007.09.009
- 871 Carcedo, M. C., & Fiori, S. M. (2012). Long-term study of the life cycle and growth of *Heleobia*  
872 *australis* (Caenogastropoda, Cochliopidae) in the Bahía Blanca estuary, Argentina. *Ciencias*  
873 *Marinas*, 38(4), 589–597. doi: 10.7773/cm.v38i4.2079
- 874 Chapman, M. G. (1995). Spatial patterns of shell shape of three species of co-existing littorinid  
875 snails in New South Wales, Australia. *Journal of Molluscan Studies*, 61(2), 141–162. doi:  
876 10.1093/mollus/61.2.141
- 877 Chevin, L.-M., & Lande, R. (2009). When do adaptive plasticity and genetic evolution prevent  
878 extinction of a density-regulated population? *Evolution*, 64(4), 1143–1150. doi: 10.1111/j.1558-  
879 5646.2009.00875.x
- 880 Cole, L. C. (1954). The population consequences of life history phenomena. *The Quarterly*  
881 *Review of Biology*, 29(2), 103–137.
- 882 Collier, J. L., Fitzgerald, S. P., Hice, L. A., Frisk, M. G., & McElroy, A. E. (2014). A new PCR-  
883 based method shows that blue crabs (*Callinectes sapidus* (Rathbun)) consume winter flounder  
884 (*Pseudopleuronectes americanus* (Walbaum)). *PLoS ONE*, 9(1), e85101. doi:  
885 10.1371/journal.pone.0085101
- 886 Conde-Padín, P., Grahame, J. W., & Rolán-Alvarez, E. (2007). Detecting shape differences in  
887 species of the *Littorina saxatilis* complex by morphometric analysis. *Journal of Molluscan*  
888 *Studies*, 73(2), 147–154. doi: 10.1093/mollus/eym009
- 889 Curtis, L. (1987). Vertical distribution of an estuarine snail altered by a parasite. *Science*,  
890 235(4795), 1509–1511. doi: 10.1126/science.3823901
- 891 De Francesco, C. G., & Isla, F. I. (2003). Distribution and abundance of hydrobiid snails in a  
892 mixed estuary and a coastal lagoon, Argentina. *Estuaries*, 26(3), 790–797. doi:  
893 10.1007/BF02711989
- 894 De Jong, G. (1999). Unpredictable selection in a structured population leads to local genetic  
895 differentiation in evolved reaction norms. *Journal of Evolutionary Biology*, 12(5), 839–851. doi:  
896 10.1046/j.1420-9101.1999.00118.x
- 897 De Jong, Gerdien. (2005). Evolution of phenotypic plasticity: patterns of plasticity and the  
898 emergence of ecotypes: Research review. *New Phytologist*, 166(1), 101–118. doi:  
899 10.1111/j.1469-8137.2005.01322.x
- 900 Denny, M. W., & Paine, R. T. (1998). Celestial mechanics, sea-level changes, and intertidal  
901 ecology. *The Biological Bulletin*, 194(2), 108–115. doi: 10.2307/1543040
- 902 Dillon, R. T., Jacquemin, S. J., & Pyron, M. (2013). Cryptic phenotypic plasticity in populations  
903 of the freshwater prosobranch snail, *Pleurocera canaliculata*. *Hydrobiologia*, 709(1), 117–127.  
904 doi: 10.1007/s10750-012-1441-1

- 905 D’Incao, F., Silva, K. G., Ruffino, M. L., & Braga, A. C. (1990). Hábito alimentar do  
906 caranguejo *Chasmagnathus granulata* Dana, 1851 na barra do Rio Grande, RS (Decapoda,  
907 Grapsidae). *Atlântica*, 12(2), 85–93.
- 908 Fox, J. (2003). Effect displays in R for generalised linear models. *Journal of Statistical*  
909 *Software*, 8(15), 1–27.
- 910 Fox, J., Weisberg, S., Adler, D., Bates, D., Baud-Bovy, G., Ellison, S., & Heilberger, R. (2011).  
911 *Package “car”: Companion to applied regression*.
- 912 Fredensborg, B. L., Mouritsen, K. N., & Poulin, R. (2005). Impact of trematodes on host  
913 survival and population density in the intertidal gastropod *Zeacumantus subcarinatus*. *Marine*  
914 *Ecology Progress Series*, 290, 109–117. doi: 10.3354/meps290109
- 915 Fredensborg, B. L., Mouritsen, K. N., & Poulin, R. (2006). Relating bird host distribution and  
916 spatial heterogeneity in trematode infections in an intertidal snail—from small to large scale.  
917 *Marine Biology*, 149(2), 275–283. doi: 10.1007/s00227-005-0184-1
- 918 Fusco, G., & Minelli, A. (2010). Phenotypic plasticity in development and evolution: facts and  
919 concepts. *Philosophical Transactions of the Royal Society B: Biological Sciences*, 365(1540),  
920 547–556. doi: 10.1098/rstb.2009.0267
- 921 Gaillard, M. C., & Castellanos, Z. A. (1976). Mollusca Gasteropoda Hydrobiidae. In *Fauna de*  
922 *agua dulce de la República Argentina* (Ringuélet R. A., Vol. 15, pp. 1–40). Buenos Aires:  
923 FECIC.
- 924 Ghalambor, C. K., McKay, J. K., Carroll, S. P., & Reznick, D. N. (2007). Adaptive versus non-  
925 adaptive phenotypic plasticity and the potential for contemporary adaptation in new  
926 environments. *Functional Ecology*, 21(3), 394–407. doi: 10.1111/j.1365-2435.2007.01283.x
- 927 Hershler, R., & Thompson, F. (1992). A review of the aquatic gastropod subfamily  
928 Cochliopinae (Prosobranchia, Hydrobiidae). *Malacological Review*, 5.
- 929 Hill, J. K., Griffiths, H. M., & Thomas, C. D. (2011). Climate change and evolutionary  
930 adaptations at species’ range margins. *Annual Review of Entomology*, 56(1), 143–159. doi:  
931 10.1146/annurev-ento-120709-144746
- 932 Hoffmann, A. A., & Sgrò, C. M. (2011). Climate change and evolutionary adaptation. *Nature*,  
933 470(7335), 479–485. doi: 10.1038/nature09670
- 934 Hollander, J., Collyer, M. L., Adams, D. C., & Johannesson, K. (2006). Phenotypic plasticity in  
935 two marine snails: constraints superseding life history. *Journal of Evolutionary Biology*, 19(6),  
936 1861–1872. doi: 10.1111/j.1420-9101.2006.01171.x
- 937 Hollander, J., Smadja, C. M., Butlin, R. K., & Reid, D. G. (2013). Genital divergence in  
938 sympatric sister snails. *Journal of Evolutionary Biology*, 26(1), 210–215. doi:  
939 10.1111/jeb.12029
- 940 Janson, K. (1987). Allozyme and shell variation in two marine snails (*Littorina*, Prosobranchia)  
941 with different dispersal abilities. *Biological Journal of the Linnean Society*, 30(3), 245–256. doi:  
942 10.1111/j.1095-8312.1987.tb00299.x
- 943 Johannesson, B., & Johannesson, K. (1996). Population differences in behaviour and  
944 morphology in the snail *Littorina saxatilis*: phenotypic plasticity or genetic differentiation?  
945 *Journal of Zoology*, 240(3), 475–493. doi: 10.1111/j.1469-7998.1996.tb05299.x

- 946 Johannesson, K. (2003). Evolution in Littorina: ecology matters. *Journal of Sea Research*,  
947 49(2), 107–117. doi: 10.1016/S1385-1101(02)00218-6
- 948 Kameda, Y., Kawakita, A., & Kato, M. (2009). Reproductive Character Displacement in Genital  
949 Morphology in *Satsuma* Land Snails. *The American Naturalist*, 173(5), 689–697. doi:  
950 10.1086/597607
- 951 Kemp, P., & Bertness, M. D. (1984). Snail shape and growth rates: Evidence for plastic shell  
952 allometry in *Littorina littorea*. *Proceedings of the National Academy of Sciences*, 81(3), 811–  
953 813. doi: 10.1073/pnas.81.3.811
- 954 Komsta, L. (2011). outliers: Tests for outliers (Version 0.14). Retrieved from [https://CRAN.R-](https://CRAN.R-project.org/package=outliers)  
955 [project.org/package=outliers](https://CRAN.R-project.org/package=outliers)
- 956 Kuris, A. M. (1974). Trophic Interactions: Similarity of Parasitic Castrators to Parasitoids. *The*  
957 *Quarterly Review of Biology*, 49(2), 129–148. doi: 10.1086/408018
- 958 Lafferty, K. D. (1993). The marine snail, *Cerithidea californica*, matures at smaller sizes where  
959 parasitism is high. *Oikos*, 68(1), 3. doi: 10.2307/3545303
- 960 Lafferty, K. D., Sammond, D. T., & Kuris, A. M. (1994). Analysis of larval trematode  
961 communities. *Ecology*, 75(8), 2275. doi: 10.2307/1940883
- 962 Levins, R. (1968). *Evolution in changing environments: some theoretical explorations*. No. 2.  
963 Princeton University Press.
- 964 Levri, E. P., Dillard, J., & Martin, T. (2005). Trematode infection correlates with shell shape  
965 and defence morphology in a freshwater snail. *Parasitology*, 130(6), 699–708. doi:  
966 10.1017/S0031182005007286
- 967 Lewontin, R. C. (1965). Selection for colonizing ability. *Proceedings of the First International*  
968 *Union of Biological Sciences Symposia on General Biol*, 77–94. Academic Press.
- 969 Machin, J. (1967). Structural adaptation for reducing water loss in three species of terrestrial  
970 snail. *Journal of Zoology*, 152(1), 55–65.
- 971 Mather, K. (1955). Polymorphism as an outcome of disruptive selection. *Evolution*, 9, 52–61.
- 972 Melatunan, S., Calosi, P., Rundle, S., Widdicombe, S., & Moody, A. (2013). Effects of ocean  
973 acidification and elevated temperature on shell plasticity and its energetic basis in an intertidal  
974 gastropod. *Marine Ecology Progress Series*, 472, 155–168. doi: 10.3354/meps10046
- 975 Merilä, J., & Hendry, A. P. (2014). Climate change, adaptation, and phenotypic plasticity: the  
976 problem and the evidence. *Evolutionary Applications*, 7(1), 1–14. doi: 10.1111/eva.12137
- 977 Miura, O., Kuris, A. M., Torchin, M. E., Hechinger, R. F., & Chiba, S. (2006). Parasites alter  
978 host phenotype and may create a new ecological niche for snail hosts. *Proceedings of the Royal*  
979 *Society B: Biological Sciences*, 273(1592), 1323–1328. doi: 10.1098/rspb.2005.3451
- 980 Mouritsen, K. N., & Jensen, K. T. (1994). The enigma of gigantism: effect of larval trematodes  
981 on growth, fecundity, egestion and locomotion in *Hydrobia ulvae* (Pennant)(Gastropoda:  
982 Prosobranchia). *Journal of Experimental Marine Biology and Ecology*, 181(1), 53–66.
- 983 Mouritsen, K. N., Sørensen, M. M., Poulin, R., & Fredensborg, B. L. (2018). Coastal  
984 ecosystems on a tipping point: Global warming and parasitism combine to alter community  
985 structure and function. *Global Change Biology*, 24(9), 4340–4356. doi: 10.1111/gcb.14312

- 986 Neves, R. A. F., Valentin, J. L., & Figueiredo, G. M. (2010). Morphological description of the  
987 gastropod *Heleobia australis* (Hydrobiidae) from egg to hatching. *Brazilian Journal of*  
988 *Oceanography*, 58(3), 247–250. doi: 10.1590/S1679-87592010000300007
- 989 Palmer, A. R. (1981). Do carbonate skeletons limit the rate of body growth? *Nature*, 292(5819),  
990 150–152.
- 991 Palmer, A. R. (1990). *Effect of crab effluent and scent of damaged conspecifics on feeding,*  
992 *growth, and shell morphology of the Atlantic dogwhelk *Nucella lapillus* (L.).* 28.
- 993 Parsons, K. E. (1997). Role of dispersal ability in the phenotypic differentiation and plasticity of  
994 two marine gastropods. *Oecologia*, 110(4), 461–471. doi: 10.1007/s004420050181
- 995 Parsons, K. E. (1998). The Role of dispersal ability in the phenotypic differentiation and  
996 plasticity of two marine gastropods II. Growth. *J. Exp. Mar. Biol. Ecol.*, 25.
- 997 Perillo, G. M. E., Piccolo, M. C., Parodi, E., & Freije, R. H. (2001). The Bahia Blanca Estuary,  
998 Argentina. In U. Seeliger & B. Kjerfve (Eds.), *Coastal Marine Ecosystems of Latin America*  
999 (Vol. 144, pp. 205–217). Berlin, Heidelberg: Springer Berlin Heidelberg. doi: 10.1007/978-3-  
1000 662-04482-7\_15
- 1001 Pfennig, D. W., Wund, M. A., Snell-Rood, E. C., Cruickshank, T., Schlichting, C. D., &  
1002 Moczek, A. P. (2010). Phenotypic plasticity's impacts on diversification and speciation. *Trends*  
1003 *in Ecology & Evolution*, 25(8), 459–467. doi: 10.1016/j.tree.2010.05.006
- 1004 Pigliucci, M., Murren, C. J., & Schlichting, C. D. (2006). Phenotypic plasticity and evolution by  
1005 genetic assimilation. *Journal of Experimental Biology*, 209(12), 2362–2367. doi:  
1006 10.1242/jeb.02070
- 1007 Pigliucci, Massimo. (2001). *Phenotypic plasticity: beyond nature and nurture*. Baltimore: Johns  
1008 Hopkins University Press.
- 1009 Pinheiro, J., Bates, D., DebRoy, S., Sarkar, D., & R Core Team. (2017). *nlme: linear and*  
1010 *nonlinear mixed effects models. R package version 3.1-131*. Retrieved from [https://CRAN.R-](https://CRAN.R-project.org/package=nlme)  
1011 [project.org/package=nlme](https://CRAN.R-project.org/package=nlme)
- 1012 Pointier, J., Noya, O., Amarista, M., & Théron, A. (2004). *Lymnaea cousini* Jousseaume, 1887  
1013 (Gastropoda: Lymnaeidae): first record for Venezuela. *Memórias Do Instituto Oswaldo Cruz*,  
1014 99(6), 567–569. doi: 10.1590/S0074-02762004000600005
- 1015 Poulin, R., & Thomas, F. (1999). Phenotypic Variability Induced by Parasites: *Parasitology*  
1016 *Today*, 15(1), 28–32. doi: 10.1016/S0169-4758(98)01357-X
- 1017 Pratolongo, P., Kirby, J., Plater, A., & Brinson, M. (2009). Temperate coastal wetlands:  
1018 morphology, sediment processes, and plant communities. In *An Integrated Ecosystem*  
1019 *Approach, Coastal Wetlands* (Perillo, G.M.E., Wolanski, E., Cahoon, D.R., Brinson, M.M.  
1020 (Eds.), pp. 185–210). Amsterdam: Elsevier.
- 1021 Pratolongo, P., Perillo, G. M. E., & Piccolo, M. C. (2010). Combined effects of waves and  
1022 plants on a mud deposition event at a mudflat-saltmarsh edge in the Bahía Blanca estuary.  
1023 *Estuarine, Coastal and Shelf Science*, 87(2), 207–212. doi: 10.1016/j.ecss.2009.09.024
- 1024 Price, T. D., Qvarnström, A., & Irwin, D. E. (2003). The role of phenotypic plasticity in driving  
1025 genetic evolution. *Proceedings of the Royal Society of London. Series B: Biological Sciences*,  
1026 270(1523), 1433–1440. doi: 10.1098/rspb.2003.2372

- 1027 Probst, S., & Kube, J. (1999). Histopathological effects of larval trematode infections in  
1028 mudsnails and their impact on host growth: what causes gigantism in *Hydrobia ventrosa*  
1029 (Gastropoda: Prosobranchia)? *Journal of Experimental Marine Biology and Ecology*, 238(1),  
1030 49–68. doi: 10.1016/S0022-0981(99)00002-7
- 1031 Puillandre, N., Lambert, A., Brouillet, S., & Achaz, G. (2012). ABGD, Automatic Barcode Gap  
1032 Discovery for primary species delimitation: ABGD, automatic barcode gap discovery.  
1033 *Molecular Ecology*, 21(8), 1864–1877. doi: 10.1111/j.1365-294X.2011.05239.x
- 1034 Reid, D. G. (1996). *Systematics and evolution of Littorina*. London: Ray Soc. Publs.
- 1035 Revelle, W. (2018). psych: Procedures for Personality and Psychological Research (Version  
1036 1.8.12.). Northwestern University, Evanston, Illinois, USA. Retrieved from [https://CRAN.R-](https://CRAN.R-project.org/package=psych)  
1037 [project.org/package=psych](https://CRAN.R-project.org/package=psych)
- 1038 Ripley, B., Venables, B., Bates, D. M., Hornik, K., Gebhardt, A., Firth, D., & Ripley, M. B.  
1039 (2013). Package ‘mass’ (Version 538).
- 1040 Roff, D. A. (1992). *The evolution of life histories: theory and analysis*. New York: Chapman &  
1041 Hall.
- 1042 Rolán-Alvarez, E. (2007). Sympatric speciation as a by-product of ecological adaptation in the  
1043 Galician *Littorina saxatilis* hybrid zone. *Journal of Molluscan Studies*, 73(1), 1–10. doi:  
1044 10.1093/mollus/eyl023
- 1045 Scheiner, S. M. (1998). The genetics of phenotypic plasticity. VII. Evolution in a spatially-  
1046 structured environment. *Journal of Evolutionary Biology*, 11(3), 303–320. doi: 10.1046/j.1420-  
1047 9101.1998.11030303.x
- 1048 Schweizer, M., Triebkorn, R., & Köhler, H. (2019). Snails in the sun: Strategies of terrestrial  
1049 gastropods to cope with hot and dry conditions. *Ecology and Evolution*, 9(22), 12940–12960.  
1050 doi: 10.1002/ece3.5607
- 1051 Smith, N. F. (2001). Spatial heterogeneity in recruitment of larval trematodes to snail  
1052 intermediate hosts. *Oecologia*, 127(1), 115–122. doi: 10.1007/s004420000560
- 1053 Spivak, E., Anger, K., Luppi, T., Bas, C., & Ismael, D. (1994). Distribution and habitat  
1054 preferences of two grapsid crab species in Mar Chiquita Lagoon (Province of Buenos Aires,  
1055 Argentina). *Helgoländer Meeresuntersuchungen*, 48(1), 59–78. doi: 10.1007/BF02366202
- 1056 Struhsaker, J. W. (1968). Selection mechanisms associated with intraspecific shell variation in  
1057 *Littorina picta* (Prosobranchia: Mesogastropoda). *Evolution*, 22(3), 459–480. doi:  
1058 10.1111/j.1558-5646.1968.tb03986.x
- 1059 Suzuki, Y., & Nijhout, H. F. (2006). Evolution of a polyphenism by genetic accommodation.  
1060 *Science*, 311(5761), 650–652. doi: 10.1126/science.1118888
- 1061 Travis, J. (1994). Evaluating the adaptive role of morphological plasticity. In *Ecological*  
1062 *Morphology: Integrative Organismal Biology* (eds P.C. Wainwright & S.M. Reilly, pp. 99–122).  
1063 Chicago: University of Chicago Press.
- 1064 Trussell, G. C. (2000a). Phenotypic clines, plasticity, and morphological trade-offs in an  
1065 intertidal snail. *Evolution*, 54(1), 151–166.
- 1066 Trussell, G. C. (2000b). Predator-induced plasticity and morphological trade-offs in latitudinally  
1067 separated populations of *Littorina obtusata*. *Evolutionary Ecology Research*, 2(6), 803–822.

- 1068 Vermeij, G. J. (1972). Intraspecific shore-level size gradients in intertidal molluscs. *Ecology*,  
1069 53(4), 693–700. doi: 10.2307/1934785
- 1070 Vermeij, G. J. (1973). Morphological patterns in high-intertidal gastropods: Adaptive strategies  
1071 and their limitations. *Marine Biology*, 20(4), 319–346. doi: 10.1007/BF00354275
- 1072 Vermeij, G. J. (1982). Phenotypic evolution in a poorly dispersing snail after arrival of a  
1073 predator. *Nature*, 299(5881), 349–350.
- 1074 Via, S., & Lande, R. (1985). Genotype-Environment Interaction and the Evolution of  
1075 Phenotypic Plasticity. *Evolution*, 39(3), 505. doi: 10.2307/2408649
- 1076 Vu, V. Q. (2011). ggbiplot: A ggplot2 based biplot (Version 0.55). Retrieved from  
1077 <http://github.com/vqv/ggbiplot>
- 1078 Waddington, C. H. (1953). Genetic assimilation of an acquired character. *Evolution*, 7, 118–  
1079 126.
- 1080 West-Eberhard, M. J. (1989). Phenotypic plasticity and the origins of diversity. *Annual Review*  
1081 *of Ecology and Systematics*, 2, 249–278.
- 1082 West-Eberhard, M. J. (2003). *Developmental plasticity and evolution*. Oxford; New York:  
1083 Oxford University Press.
- 1084 West-Eberhard, M. J. (2005). Developmental plasticity and the origin of species differences.  
1085 *Proceedings of the National Academy of Sciences*, 102(Supplement 1), 6543–6549. doi:  
1086 10.1073/pnas.0501844102
- 1087 Wickham, H. (2011). The Split-Apply-Combine Strategy for Data Analysis. *Journal of*  
1088 *Statistical Software*, 40(1), 1–29.
- 1089 Wickham, H., & Chang, W. (2008). ggplot2: an Implementation of the Grammar of Graphics  
1090 (Version 0.7. 0.7). Retrieved from <http://CRAN.R-Project.Org/package=ggplot2>
- 1091 Wickham, H., François, R., Henry, L., & Müller, K. (2019). dplyr: A Grammar of data  
1092 manipulation (Version 0.8.3). Retrieved from <https://CRAN.R-project.org/package=dplyr>
- 1093 Wickham, H., Hester, J., & Chang, W. (2019). devtools: Tools to Make Developing R Packages  
1094 Easier (Version 2.1.0). Retrieved from <https://CRAN.R-project.org/package=devtools>
- 1095 Yamada, S. B. (1987). Geographic variation in the growth rates of *Littorina littorea* and *L.*  
1096 *saxatilis*. *Marine Biology*, 96(4), 529–534. doi: 10.1007/BF00397970
- 1097 Zuur, A. F. (Ed.). (2009). *Mixed effects models and extensions in ecology with R*. New York,  
1098 NY: Springer.
- 1099



1100 **Tables**

1101 **Table 1.** Summary of means ( $\pm$ SE) and statistical significance of the two-way ANOVA testing for habitat and seasonal effect on total snail  
 1102 density (ind./per sample; one sample being 78.5 cm<sup>-2</sup>) of the intertidal mud snail *Heleobia australis* from the Bahía Blanca estuary, Argentina.  
 1103 Number of samples are indicated between parentheses. Value in bold indicate overall mean. We reported raw estimates whereas the model fits  
 1104 for Ln-transformed density. See Methods section for details.

1105

|               | Seasons         | Habitats    |             |             | Mean by Season      | Habitat effect               | Habitat comparison | Effect size         | Season effect               | Season comparison    | Effect size         |       |
|---------------|-----------------|-------------|-------------|-------------|---------------------|------------------------------|--------------------|---------------------|-----------------------------|----------------------|---------------------|-------|
|               |                 | Flats (F)   | Marshes (M) | Pans (P)    |                     |                              |                    |                     |                             |                      |                     |       |
| Total density | Summer (Su)     | 132±17 (9)  | 52±14 (9)   | 128±20 (9)  | 104±12 (27)         | $F_{(2, 106)} = 15.48^{***}$ | P vs. M            | 5.49 <sup>***</sup> | $F_{(3, 106)} = 6.22^{***}$ | Au vs. Sp            | 4.26 <sup>***</sup> |       |
|               | Autumn (Au)     | 65±13 (9)   | 87±42 (9)   | 70±14 (9)   | 74±15 (27)          |                              | M vs. F            |                     |                             | -3.54 <sup>***</sup> | Wi vs. Sp           | 2.69* |
|               | Winter (Wi)     | 92±20 (8)   | 70±24 (9)   | 206±30 (9)  | 124±18 (26)         |                              | P vs. F            |                     |                             | 1.91                 | Su vs. Sp           | 2.57* |
|               | Spring (Sp)     | 187±36 (9)  | 114±36 (9)  | 317±34 (9)  | 206±26 (27)         |                              |                    |                     |                             |                      | Su vs. Au           | 1.68  |
|               | Mean by Habitat | 120±14 (35) | 81±15 (36)  | 180±20 (36) | <b>127±10 (107)</b> |                              |                    |                     |                             | Au vs. Wi            | 1.53                |       |
|               |                 |             |             |             |                     |                              |                    |                     |                             | Su vs. Wi            | 0.14                |       |

1106

1107 \*  $P < 0.05$ ; \*\*  $P < 0.01$ ; \*\*\*  $P < 0.001$ . We applied the Holm-Bonferroni correction for multiple testing when comparing effect sizes.

1108 **Table 2.** Uninfected adult snails. Summary of means ( $\pm$ SE) and statistical significance of habitat and sex effect on shell and aperture  
 1109 morphometry of uninfected adult individuals of the mud snail *Heleobia australis* from the intertidal area of the Bahía Blanca estuary, Argentina.  
 1110 Variables are the same as indicated in table 2. Number of observations are indicated between parentheses, which are only shown for shell size but  
 1111 are the same for other traits measured.  
 1112

| Traits measured   | Habitat type           | Sex                    |                        | Sex pooled             | Habitat effect                           | Habitat comparison   | Effect size           | Sex effect                              | Sex comparison | Effect size         |
|-------------------|------------------------|------------------------|------------------------|------------------------|------------------------------------------|----------------------|-----------------------|-----------------------------------------|----------------|---------------------|
|                   |                        | Males (♂)              | Females (♀)            |                        |                                          |                      |                       |                                         |                |                     |
| Shell size $\Phi$ | Flats (F)              | 6.19 $\pm$ 0.18 (388)  | 6.17 $\pm$ 0.18 (396)  | 6.17 $\pm$ 0.16 (784)  | <i>Males</i><br>$X_2^2 = 346.22^{***}$   | P vs. F              | 17.91 <sup>***</sup>  | <i>Flats</i><br>$X_1^2 = 0.20$ ; n.s.   | ♂ vs. ♀        | 0.50                |
|                   | Marshes (M)            | 6.78 $\pm$ 0.13 (266)  | 6.64 $\pm$ 0.11 (245)  | 6.71 $\pm$ 0.11 (511)  |                                          | P vs. M              | 11.01 <sup>***</sup>  |                                         |                |                     |
|                   | Pans (P)               | 7.97 $\pm$ 0.36 (600)  | 7.55 $\pm$ 0.40 (738)  | 7.74 $\pm$ 0.40 (1338) | <i>Females</i><br>$X_2^2 = 249.33^{***}$ | M vs. F              | 4.08 <sup>***</sup>   | <i>Marshes</i><br>$X_1^2 = 1.57$ ; n.s. | ♂ vs. ♀        | 1.25                |
|                   | <i>Habitats pooled</i> | 7.14 $\pm$ 0.22 (1254) | 6.95 $\pm$ 0.25 (1379) |                        |                                          | P vs. F              | 15.20 <sup>***</sup>  |                                         |                |                     |
|                   |                        |                        |                        |                        |                                          | P vs. M              | 9.01 <sup>***</sup>   | <i>Pans</i><br>$X_1^2 = 24.30^{***}$    | ♂ vs. ♀        | 4.93 <sup>***</sup> |
|                   |                        |                        |                        |                        |                                          | M vs. F              | 3.62 <sup>***</sup>   |                                         |                |                     |
| Shell shape<br>†  | Flats                  | 2.27 $\pm$ 0.02        | 2.26 $\pm$ 0.02        | 2.27 $\pm$ 0.02        | $X_2^2 = 101.02^{***}$                   | P vs. F              | 10.13 <sup>***</sup>  | $X_1^2 = 29.02^{***}$                   | ♂ vs. ♀        | 5.39 <sup>***</sup> |
|                   | Marshes                | 2.32 $\pm$ 0.01        | 2.29 $\pm$ 0.01        | 2.31 $\pm$ 0.01        |                                          | P vs. M              | 5.31 <sup>***</sup>   |                                         |                |                     |
|                   | Pans                   | 2.35 $\pm$ 0.01        | 2.31 $\pm$ 0.01        | 2.33 $\pm$ 0.01        | M vs. F                                  | 3.61 <sup>***</sup>  |                       |                                         |                |                     |
|                   | <i>Habitats pooled</i> | 2.32 $\pm$ 0.01        | 2.29 $\pm$ 0.01        |                        |                                          |                      |                       |                                         |                |                     |
| Aperture size     | Flats                  | 1.82 $\pm$ 0.05        | 1.83 $\pm$ 0.06        | 1.82 $\pm$ 0.05        | $X_2^2 = 362.62^{***}$                   | P vs. F              | 17.10 <sup>***</sup>  | $X_1^2 = 8.54^{**}$                     | ♂ vs. ♀        | 2.93 <sup>**</sup>  |
|                   | Marshes                | 1.90 $\pm$ 0.04        | 1.86 $\pm$ 0.03        | 1.88 $\pm$ 0.03        |                                          | P vs. M              | 12.79 <sup>***</sup>  |                                         |                |                     |
|                   | Pans                   | 2.10 $\pm$ 0.09        | 2.05 $\pm$ 0.10        | 2.07 $\pm$ 0.09        | M vs. F                                  | 1.63                 |                       |                                         |                |                     |
|                   | <i>Habitats pooled</i> | 1.97 $\pm$ 0.06        | 1.94 $\pm$ 0.07        |                        |                                          |                      |                       |                                         |                |                     |
| Aperture shape    | Flats                  | 1.73 $\pm$ 0.03        | 1.73 $\pm$ 0.03        | 1.73 $\pm$ 0.03        | $X_2^2 = 535.73^{***}$                   | P vs. F              | -22.91 <sup>***</sup> | $X_1^2 = 0.04$ ; n.s.                   | ♂ vs. ♀        | -0.20               |
|                   | Marshes                | 1.70 $\pm$ 0.02        | 1.71 $\pm$ 0.01        | 1.70 $\pm$ 0.02        |                                          | P vs. M              | -15.35 <sup>***</sup> |                                         |                |                     |
|                   | Pans                   | 1.60 $\pm$ 0.02        | 1.60 $\pm$ 0.02        | 1.60 $\pm$ 0.02        | M vs. F                                  | -3.86 <sup>***</sup> |                       |                                         |                |                     |
|                   | <i>Habitats pooled</i> | 1.66 $\pm$ 0.02        | 1.66 $\pm$ 0.03        |                        |                                          |                      |                       |                                         |                |                     |

1113  $\Phi$  As there was a significant interaction between Habitat and Sex when testing shell size, we report effect sizes separately for this trait.  
 1114 † We report estimates of shell shape corrected for shell size, as the pattern observed was not the same when removing the covariate from the model.  
 1115 \*  $P < 0.05$ ; \*\*  $P < 0.01$ ; \*\*\*  $P < 0.001$ . We applied the Holm-Bonferroni correction for multiple testing when comparing effect sizes  
 1116  
 1117  
 1118

1119 **Table 3.** Infected vs. Uninfected adult snails. Summary of means ( $\pm$ SE) and statistical significance of status (infected of uninfected) and sex  
 1120 effect on shell and aperture morphometry of the intertidal mud snail *Heleobia australis* from the Bahía Blanca estuary, Argentina. In these  
 1121 analyses we only considered individuals from pans, which allowed for preventing habitat effect on morphometry. Shell size estimated as the  
 1122 volume of a cone ( $\text{mm}^3$ ), shell shape as the length to width ratio (SL/SW), aperture size as the area of an ellipse ( $\text{mm}^2$ ), and aperture shape as the  
 1123 ratio between aperture length and width (AL/AW). Number of observations are indicated between parentheses, which are only shown for shell  
 1124 size but are the same for other traits measured.  
 1125

| Traits measured       | Habitat type   | Sex                    |                        | Sex pooled             | Status effect          | Status comparison | Effect size       | Sex Effect              | Sex comparison | Effect size   |                       |
|-----------------------|----------------|------------------------|------------------------|------------------------|------------------------|-------------------|-------------------|-------------------------|----------------|---------------|-----------------------|
|                       |                | Male (♂)               | Female (♀)             |                        |                        |                   |                   |                         |                |               |                       |
| Shell size            | Uninfected (U) | 7.97 $\pm$ 0.36 (600)  | 7.55 $\pm$ 0.40 (738)  | 7.74 $\pm$ 0.38 (1338) | $X_1^2 = 149.69^{***}$ | U vs. I           | 12.42 $^{***}$    | $X_1^2 = 31.68^{***}$   | ♂ vs. ♀        | 5.65 $^{***}$ |                       |
|                       | Infected (I)   | 7.01 $\pm$ 0.14 (432)  | 6.76 $\pm$ 0.20 (573)  | 6.86 $\pm$ 0.16 (1005) |                        |                   |                   |                         |                |               |                       |
|                       | Status pooled  | 7.59 $\pm$ 0.28 (1032) | 7.22 $\pm$ 0.32 (1311) |                        |                        |                   |                   |                         |                |               |                       |
| Shell shape<br>$\Phi$ | Uninfected     | 2.36 $\pm$ 0.01        | 2.32 $\pm$ 0.01        | 2.34 $\pm$ 0.01        | $X_1^2 = 11.82^{***}$  | U vs. I           | 3.43 $^{***}$     | $X_1^2 = 37.51^{***}$   | ♂ vs. ♀        | 6.12 $^{***}$ |                       |
|                       | Infected       | 2.40 $\pm$ 0.01        | 2.39 $\pm$ 0.02        | 2.40 $\pm$ 0.01        |                        |                   |                   |                         |                |               |                       |
|                       | Status pooled  | 2.38 $\pm$ 0.01        | 2.35 $\pm$ 0.01        |                        |                        |                   |                   |                         |                |               |                       |
|                       |                |                        |                        |                        | <i>Males</i>           |                   | <i>Uninfected</i> |                         |                |               |                       |
|                       |                |                        |                        |                        | $X_1^2 = 99.50^{***}$  |                   | U vs. I           |                         | 9.98 $^{***}$  |               | $X_1^2 = 0.09$ ; n.s. |
|                       |                |                        |                        |                        | <i>Females</i>         |                   | <i>Infected</i>   |                         |                |               |                       |
| Aperture size         | Uninfected     | 2.10 $\pm$ 0.09        | 2.05 $\pm$ 0.10        | 2.07 $\pm$ 0.09        | $X_1^2 = 408.65^{***}$ | U vs. I           | 21.11 $^{***}$    | $X_1^2 = 14.95^{***}$   | ♂ vs. ♀        | 3.88 $^{***}$ |                       |
|                       | Infected       | 1.80 $\pm$ 0.04        | 1.76 $\pm$ 0.06        | 1.77 $\pm$ 0.05        |                        |                   |                   |                         |                |               |                       |
|                       | Status pooled  | 1.98 $\pm$ 0.07        | 1.92 $\pm$ 0.08        |                        |                        |                   |                   |                         |                |               |                       |
| Aperture shape        | Uninfected     | 1.60 $\pm$ 0.02        | 1.60 $\pm$ 0.02        | 1.60 $\pm$ 0.02        | $X_1^2 = 60.57^{***}$  | U vs. I           | 7.83 $^{**}$      | $X_1^2 = 1.3e-3$ ; n.s. | ♂ vs. ♀        | 0.03          |                       |
|                       | Infected       | 1.56 $\pm$ 0.02        | 1.56 $\pm$ 0.02        | 1.56 $\pm$ 0.02        |                        |                   |                   |                         |                |               |                       |
|                       | Status pooled  | 1.58 $\pm$ 0.02        | 1.58 $\pm$ 0.02        |                        |                        |                   |                   |                         |                |               |                       |

1126  
 1127  $\Phi$  As there was a significant interaction between Status and Sex when testing shell shape, we report effect sizes separately for this trait.  
 1128 \*  $P < 0.05$ ; \*\*  $P < 0.01$ ; \*\*\*  $P < 0.001$ . We applied the Holm-Bonferroni correction for multiple testing when comparing effect sizes.  
 1129

1130 **Figure Captions**

1131 **Figure 1.** Variation in total density (juveniles and adults pooled) of the planktotrophic  
1132 snail *Heleobia australis* across habitats and seasons in the intertidal area of the Bahía  
1133 Blanca estuary, Argentina. Bars represent  $\pm 1$  SE.

1134

1135 **Figure 2.** Phenotypic variation in shell and aperture morphometrics of uninfected adult  
1136 snails *Heleobia australis* (cat. *i*) in the Bahía Blanca estuary, Argentina. Blue and red  
1137 dots indicate mean values of each variable and sex in each habitat (flats, marshes, and  
1138 pans). Mean values of shell shape were statistically corrected for shell size. Bars  
1139 represent  $\pm 1$  SE.

1140

1141 **Figure 3.** Phenotypic variation in shell and aperture morphometrics of infected and  
1142 uninfected adult snails *Heleobia australis* (cat. *iv*) in response to a strong parasite  
1143 pressure from a habitat with low environmental stress conditions but high parasite  
1144 prevalence (pans) in the Bahía Blanca estuary, Argentina. Blue and red dots indicate  
1145 mean values of each variable and sex (males and females, respectively). Mean values of  
1146 aperture size were statistically corrected for shell size. Bars represent  $\pm 1$  SE.

1147

1148 **Figure 4.** Shell weight (as a proxy of thickness) and body mass variation of the  
1149 intertidal mud snail *Heleobia australis* across habitats with different biotic and abiotic  
1150 selective pressures in the Bahía Blanca estuary, Argentina. Bars represent  $\pm 1$  SE.

1151

1152 **Figure 5.** Differences in penis size ( $\text{mm}^2$ ) of uninfected adult snails *Heleobia australis*  
1153 collected from three environmentally distinct habitats from the Bahía Blanca estuary,  
1154 Argentina and kept in standard laboratory conditions for 21 months, which ensured that  
1155 individuals analyzed were all adults. Bars represent  $\pm 1$  SE.

1156

1157 **Figure 6.** Summary of the responses observed in snail population density, shell and  
1158 aperture morphometry, and shell and body weight of the intertidal mud snail *Heleobia*  
1159 *australis* from the Bahía Blanca estuary, Argentina. Such responses were induced by: (i)  
1160 environmental pressure, whereby snails experiencing prolonged submersion times in  
1161 habitats that remain covered by water during low tide (pans) exhibited higher density  
1162 and higher mean values of morphological traits relative to those from more

1163 environmental stress conditions (flats and marshes), which showed opposite phenotypic  
1164 responses; (ii) predation pressure caused by the presence of the burrowing crab  
1165 *Neohelice granulata* could be linked to the remarkable low density in marshes and  
1166 could have favored the expression of shell defenses as shell thickening, increased shell  
1167 globosity (lower SL to SW ratio), narrower apertures (higher AL to AW ratio); and (iii)  
1168 strong parasite pressure caused by *Microphallus simillimus* where morphological traits  
1169 of infected (I) snails shifted to lower mean values compared to uninfected (U) ones;  
1170 note that polymorphisms are only shown for pans, where parasite prevalence was the  
1171 highest. Responses observed in this study are indicated by color-filled boxes, white-  
1172 filled boxes indicate possible mechanisms or processes that might explain the observed  
1173 responses. Green color refers to responses induced by environmental pressure, orange to  
1174 polymorphism induced by crab predation, and pink by parasite pressure. Upper arrows  
1175 (↑) indicate increase/higher/longer and down arrows (↓) indicate decrease/lower/shorter.

1176 **Figures**

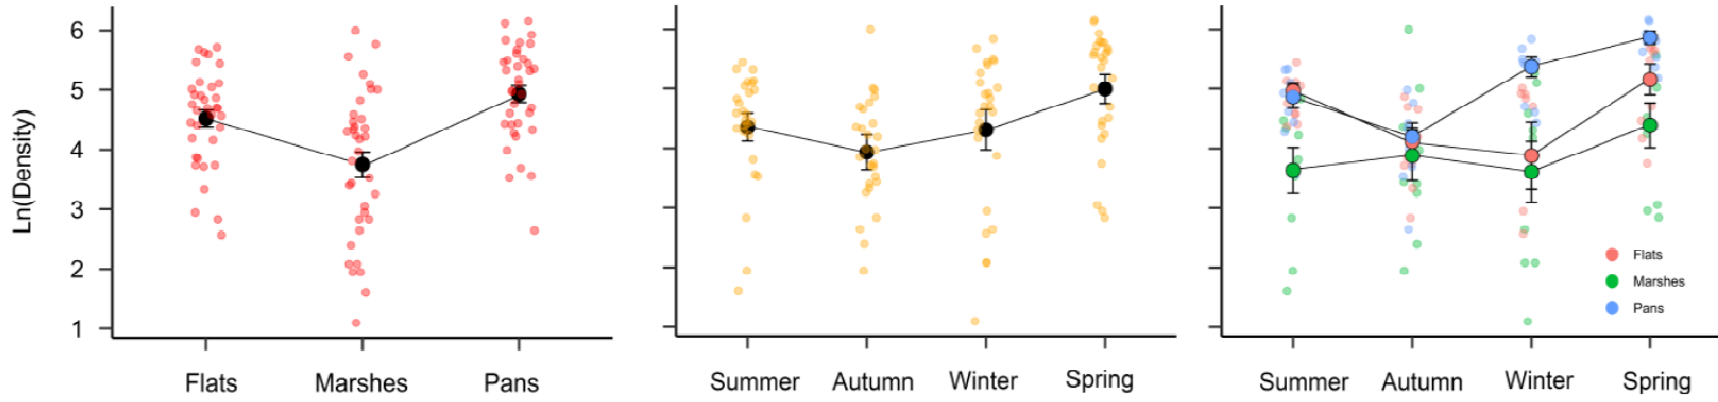

1177

1178 **Figure 1.**

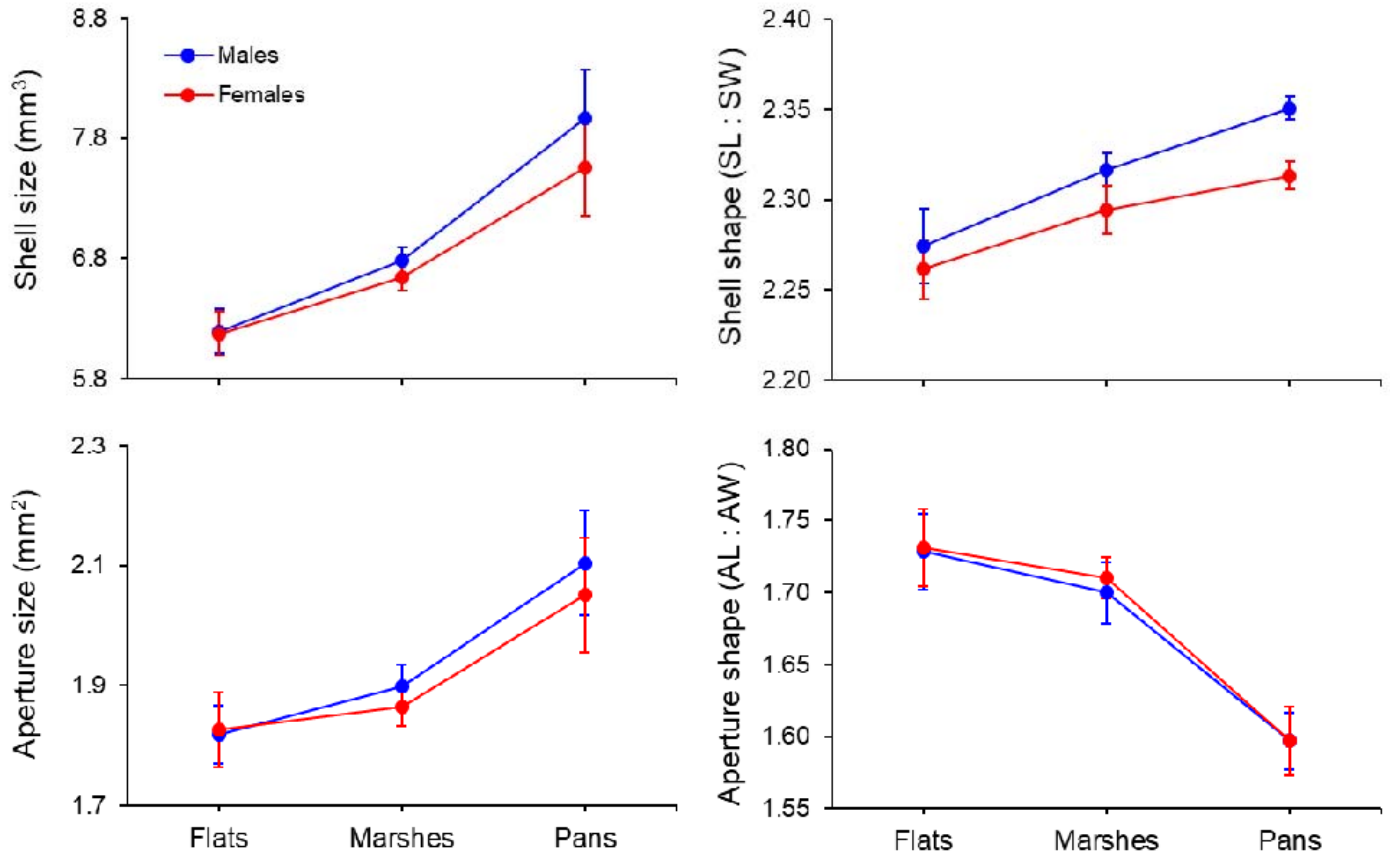

1179

1180

**Figure 2.**

1181

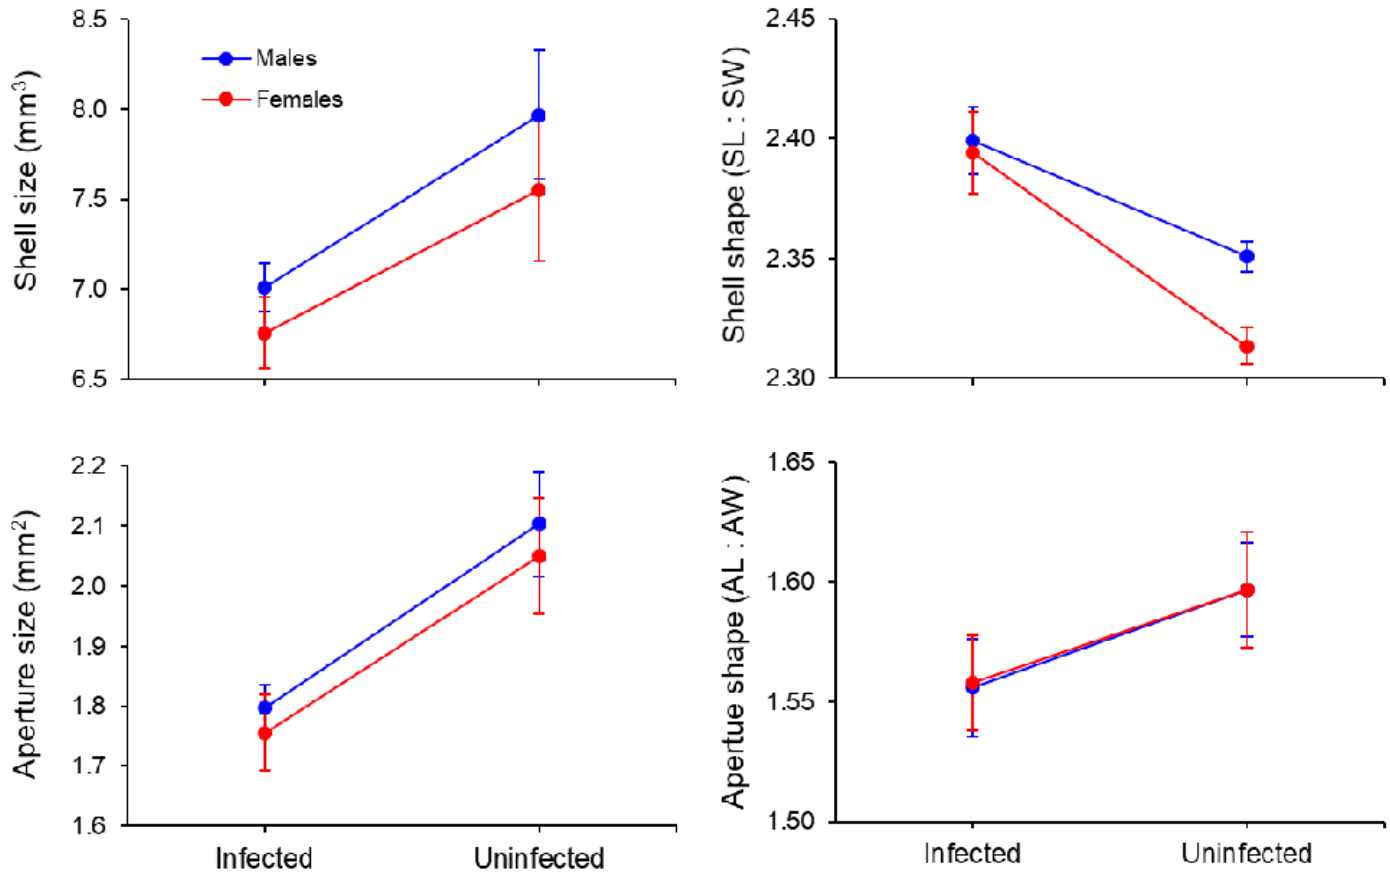

1182

1183

**Figure 3.**



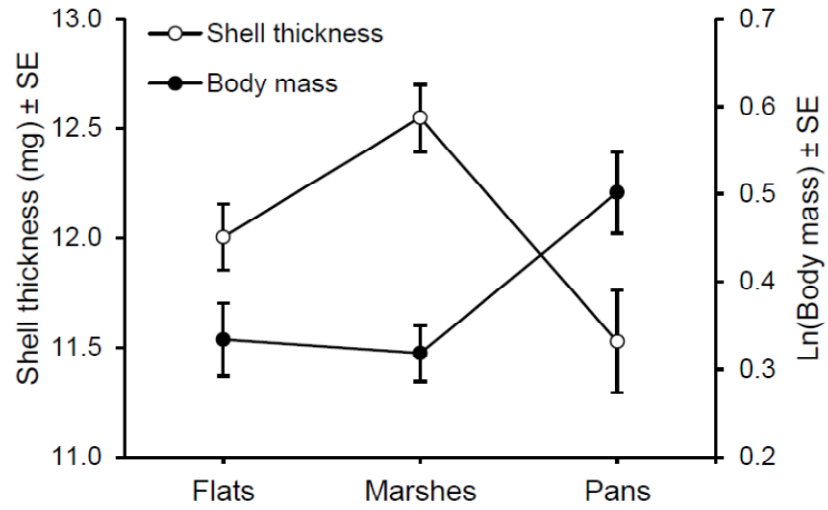

1184

1185 **Figure 4.**

1186

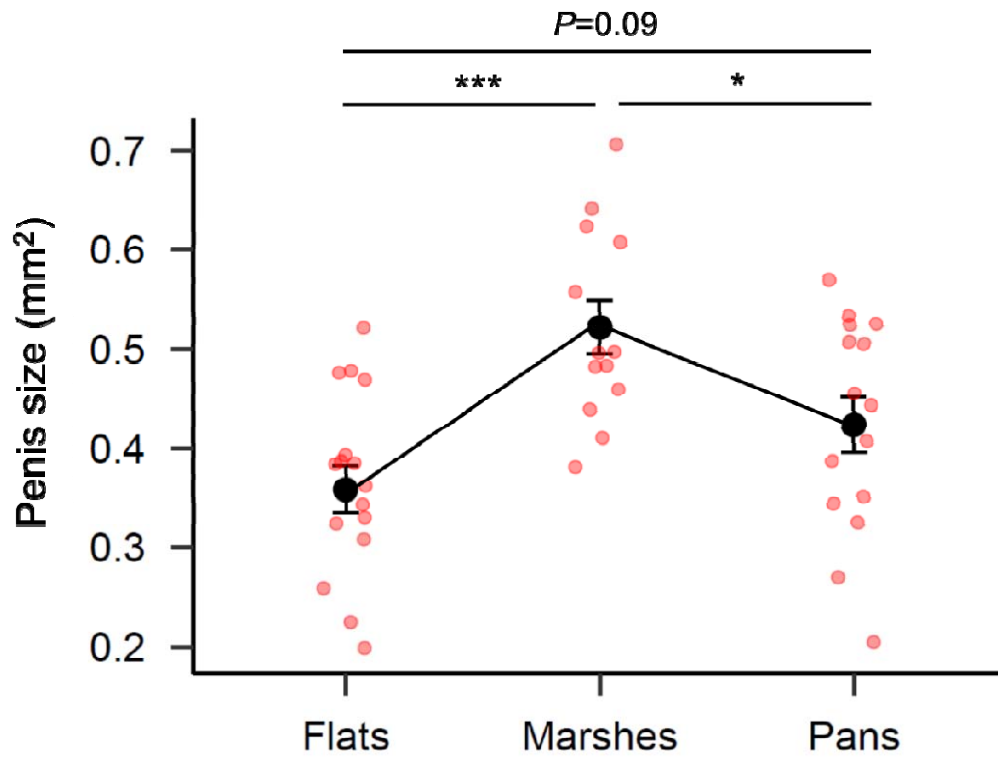

1187

1188 **Figure 5.**

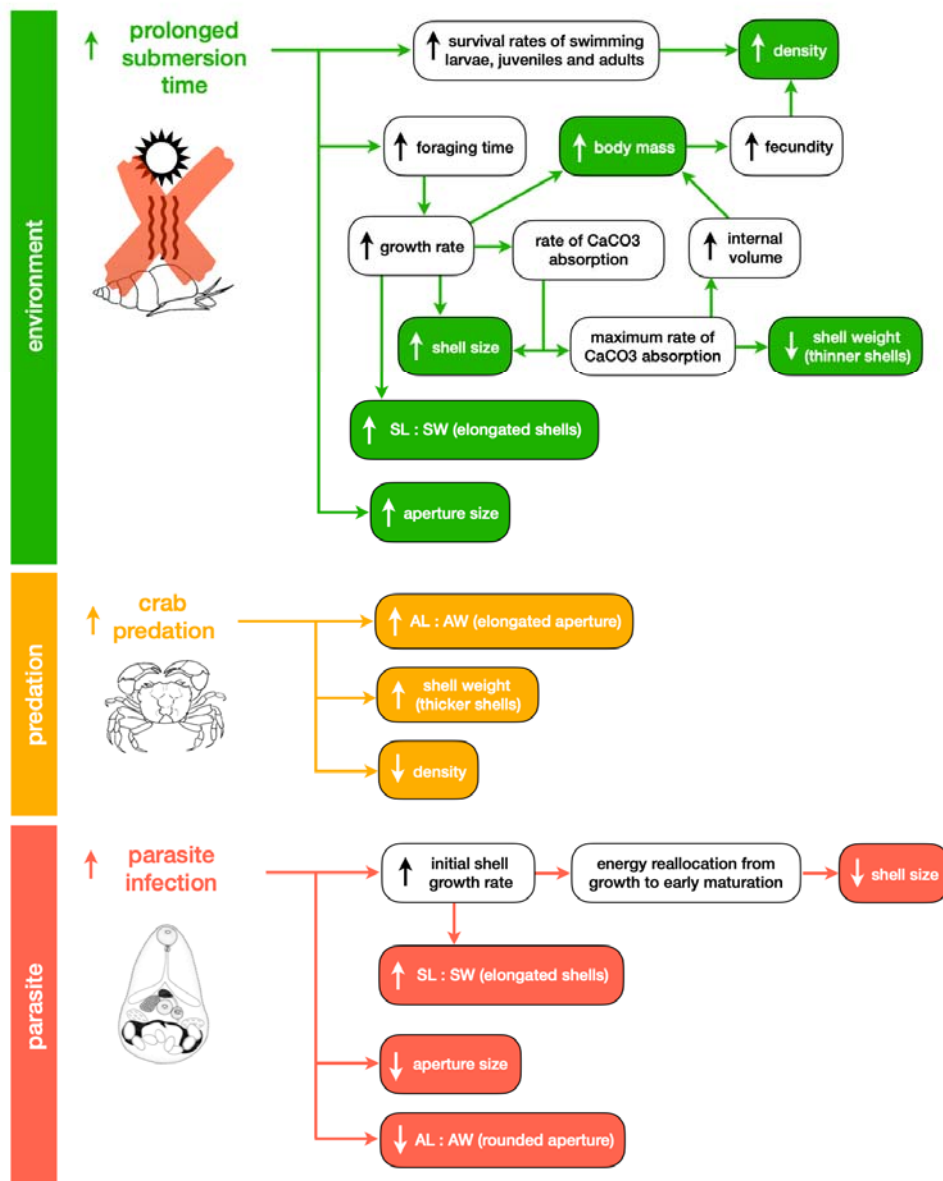

1189

1190 **Figure 6.**

1191
